# Supplementary material for: Multi-decadal floodplain classification and trend analysis in the Upper Columbia River valley, British Columbia
Source: Copernicus journal article supplement (doi:10.5194/hess-28-2203-2024), 2024-05-24
Supplement: Supplementary file 1 [file hess-28-2203-2024-supplement.pdf]

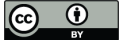

*Supplement of*

## **Multi-decadal floodplain classification and trend analysis in the Upper Columbia River valley, British Columbia**

**Italo Sampaio Rodrigues et al.**

*Correspondence to:* Italo Sampaio Rodrigues ([italo.rodrigues@uleth.ca](mailto:italo.rodrigues@uleth.ca))

The copyright of individual parts of the supplement might differ from the article licence.

1  
2  
3  
4  
5  
6  
7  
8  
9  
10  
11  
12  
13  
14  
15  
16  
17  
18  
19  
20  
21  
22

## Supplementary Material

### 1. Auxiliary Data

The followings are detailed descriptions of wetland-related datasets.

(i) The Historical Global Land Cover (created by the Hermosilla et al., 2022) is a high spatial resolution (30m) land cover maps for Canada’s ecosystems (1984-2019) (Overall accuracy of 80%). These time-series land cover maps were produced from annual time-series of Landsat image composites, forest change information, and ancillary topographic and hydrologic data. It was used (i) a refined training pool derived from existing land cover products using airborne and spaceborne measures of forest structure; (ii) selection of training samples proportionally to the land cover distribution using a distance weighted approach; and (iii) generation of regional classification models using a 150x150 km tiling system.

23 **2. Confusion matrix, total accuracy, omission, commission, and its corresponding classified raster**

24 **2.1. Season: April to mid-May**

25 **Table S1.** Confusion Matrix with commission and omission errors from April to mid-May 1984

| Classes        | Water | Marsh | Wet meadow | Woody/Shrub | Marginal total | Comission Error | Total Accuracy | Kappa Index |
|----------------|-------|-------|------------|-------------|----------------|-----------------|----------------|-------------|
| Water          | 97    | 3     | 0          | 0           | 100            | 0.03            | 88.0%          | 0.84        |
| Marsh          | 0     | 82    | 18         | 0           | 100            | 0.18            |                |             |
| Wet meadow     | 0     | 10    | 89         | 1           | 100            | 0.11            |                |             |
| Woody/Shrub    | 0     | 6     | 10         | 84          | 100            | 0.16            |                |             |
| Marginal total | 97    | 101   | 117        | 85          | 400            |                 |                |             |
| Omission Error | 0     | 0.19  | 0.24       | 0.01        |                |                 |                |             |

26

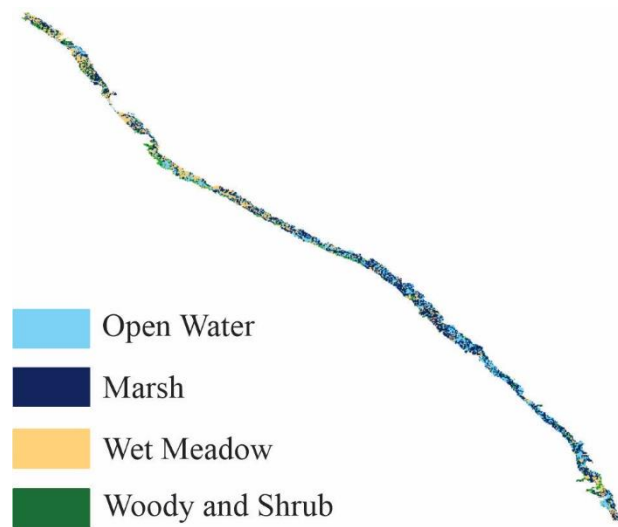

27

28

29 **Table S2.** Confusion Matrix with commission and omission errors from April to mid-May 1985

| Classes        | Water | Marsh | Wet meadow | Woody/Shrub | Marginal total | Comission Error | Total Accuracy | Kappa Index |
|----------------|-------|-------|------------|-------------|----------------|-----------------|----------------|-------------|
| Water          | 97    | 3     | 0          | 0           | 100            | 0.03            | 88.0%          | 0.84        |
| Marsh          | 0     | 82    | 18         | 0           | 100            | 0.18            |                |             |
| Wet meadow     | 0     | 10    | 89         | 1           | 100            | 0.11            |                |             |
| Woody/Shrub    | 0     | 6     | 10         | 84          | 100            | 0.16            |                |             |
| Marginal total | 97    | 101   | 117        | 85          | 400            |                 |                |             |
| Omission Error | 0     | 0.19  | 0.24       | 0.01        |                |                 |                |             |

30

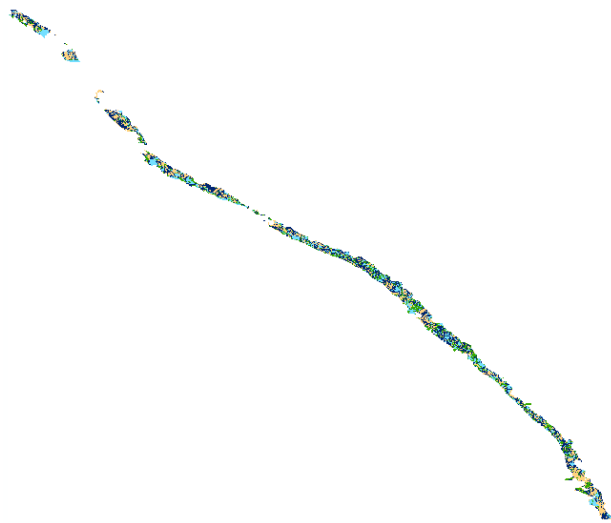

31

32

33

**Table S3.** Confusion Matrix with commission and omission errors from April to mid-May 1986

| Classes        | Water | Marsh | Wet meadow | Woody/Shrub | Marginal total | Comission Error | Total Accuracy | Kappa Index |
|----------------|-------|-------|------------|-------------|----------------|-----------------|----------------|-------------|
| Water          | 97    | 3     | 0          | 0           | 100            | 0.03            | 88.0%          | 0.84        |
| Marsh          | 0     | 82    | 18         | 0           | 100            | 0.18            |                |             |
| Wet meadow     | 0     | 10    | 89         | 1           | 100            | 0.11            |                |             |
| Woody/Shrub    | 0     | 6     | 10         | 84          | 100            | 0.16            |                |             |
| Marginal total | 97    | 101   | 117        | 85          | 400            |                 |                |             |
| Omission Error | 0     | 0.19  | 0.24       | 0.01        |                |                 |                |             |

34

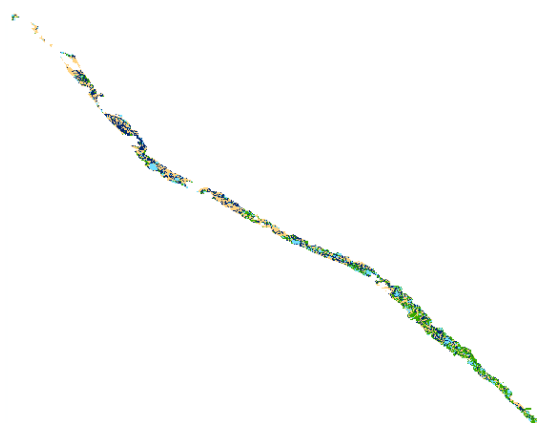

35

36

37

38

**Table S4.** Confusion Matrix with commission and omission errors from April to mid-May 1987

| Classes        | Water | Marsh | Wet meadow | Woody/Shrub | Marginal total | Comission Error | Total Accuracy | Kappa Index |
|----------------|-------|-------|------------|-------------|----------------|-----------------|----------------|-------------|
| Water          | 92    | 8     | 0          | 0           | 100            | 0.08            | 87.5%          | 0.83        |
| Marsh          | 0     | 80    | 20         | 0           | 100            | 0.20            |                |             |
| Wet meadow     | 0     | 10    | 87         | 3           | 100            | 0.13            |                |             |
| Woody/Shrub    | 0     | 6     | 3          | 91          | 100            | 0.09            |                |             |
| Marginal total | 92    | 104   | 110        | 94          | 400            |                 |                |             |
| Omission Error | 0     | 0.23  | 0.21       | 0.03        |                |                 |                |             |

39

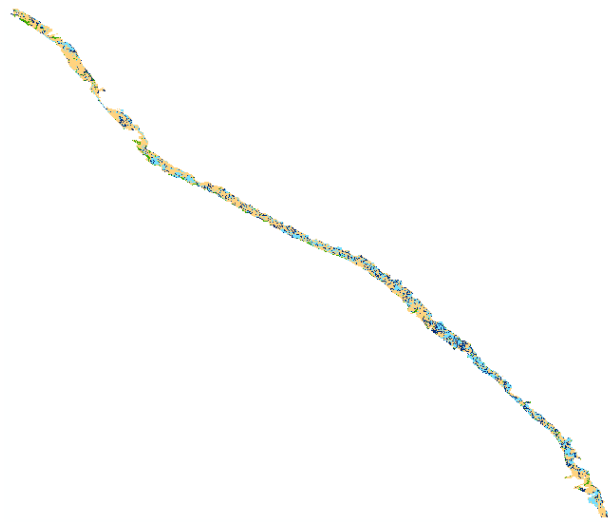

40

41

42

**Table S5.** Confusion Matrix with commission and omission errors from April to mid-May 1988

| Classes        | Water | Marsh | Wet meadow | Woody/Shrub | Marginal total | Comission Error | Total Accuracy | Kappa Index |
|----------------|-------|-------|------------|-------------|----------------|-----------------|----------------|-------------|
| Water          | 95    | 5     | 0          | 0           | 100            | 0.05            | 84.8%          | 0.80        |
| Marsh          | 0     | 78    | 18         | 4           | 100            | 0.22            |                |             |
| Wet meadow     | 0     | 10    | 78         | 12          | 100            | 0.22            |                |             |
| Woody/Shrub    | 0     | 7     | 5          | 88          | 100            | 0.12            |                |             |
| Marginal total | 95    | 100   | 101        | 104         | 400            |                 |                |             |
| Omission Error | 0     | 0.22  | 0.23       | 0.15        |                |                 |                |             |

43

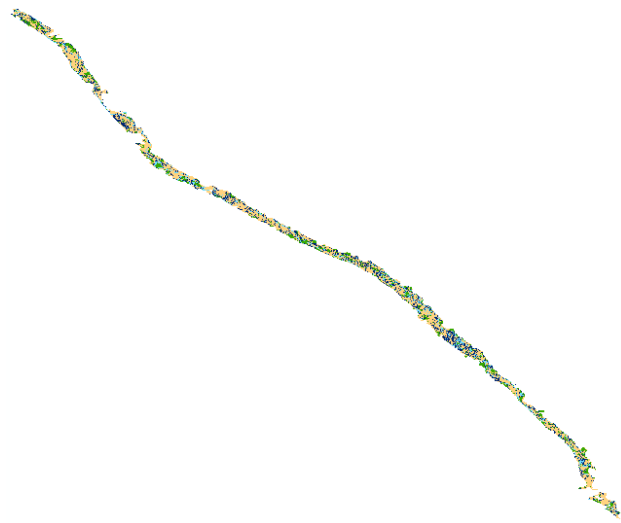

44

45

46

**Table S6.** Confusion Matrix with commission and omission errors from April to mid-May 1989

| Classes        | Water | Marsh | Wet meadow | Woody/Shrub | Marginal total | Comission Error | Total Accuracy | Kappa Index |
|----------------|-------|-------|------------|-------------|----------------|-----------------|----------------|-------------|
| Water          | 96    | 4     | 0          | 0           | 100            | 0.04            | 84.3%          | 0.79        |
| Marsh          | 3     | 75    | 12         | 10          | 100            | 0.25            |                |             |
| Wet meadow     | 2     | 10    | 82         | 6           | 100            | 0.18            |                |             |
| Woody/Shrub    | 0     | 7     | 9          | 84          | 100            | 0.16            |                |             |
| Marginal total | 101   | 96    | 103        | 100         | 400            |                 |                |             |
| Omission Error | 0.05  | 0.22  | 0.20       | 0.16        |                |                 |                |             |

47

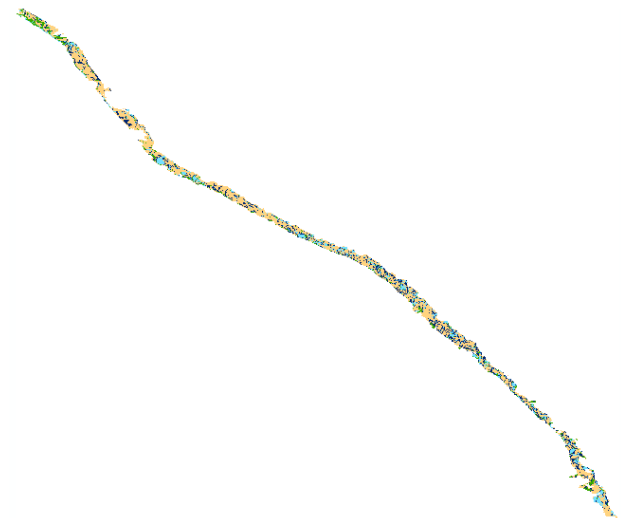

48

49

50

51

**Table S7.** Confusion Matrix with commission and omission errors from April to mid-May 1990

| Classes        | Water | Marsh | Wet meadow | Woody/Shrub | Marginal total | Comission Error | Total Accuracy | Kappa Index |
|----------------|-------|-------|------------|-------------|----------------|-----------------|----------------|-------------|
| Water          | 90    | 6     | 4          | 0           | 100            | 0.10            | 88.3%          | 0.84        |
| Marsh          | 3     | 86    | 4          | 7           | 100            | 0.14            |                |             |
| Wet meadow     | 2     | 10    | 86         | 2           | 100            | 0.14            |                |             |
| Woody/Shrub    | 0     | 4     | 5          | 91          | 100            | 0.09            |                |             |
| Marginal total | 95    | 106   | 99         | 100         | 400            |                 |                |             |
| Omission Error | 0.05  | 0.19  | 0.13       | 0.09        |                |                 |                |             |

52

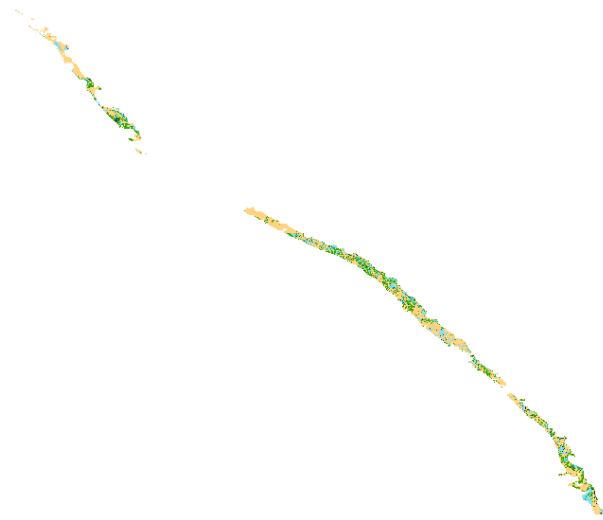

53

54

55

**Table S8.** Confusion Matrix with commission and omission errors from April to mid-May 1991

| Classes        | Water | Marsh | Wet meadow | Woody/Shrub | Marginal total | Comission Error | Total Accuracy | Kappa Index |
|----------------|-------|-------|------------|-------------|----------------|-----------------|----------------|-------------|
| Water          | 86    | 5     | 9          | 0           | 100            | 0.14            | 87.3%          | 0.83        |
| Marsh          | 5     | 88    | 3          | 4           | 100            | 0.12            |                |             |
| Wet meadow     | 2     | 7     | 89         | 2           | 100            | 0.11            |                |             |
| Woody/Shrub    | 0     | 9     | 5          | 86          | 100            | 0.14            |                |             |
| Marginal total | 93    | 109   | 106        | 92          | 400            |                 |                |             |
| Omission Error | 0.08  | 0.19  | 0.16       | 0.07        |                |                 |                |             |

56

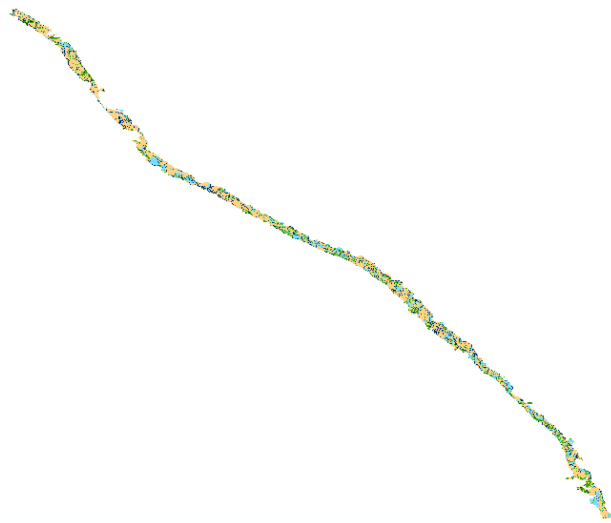

57

58

59

**Table S9.** Confusion Matrix with commission and omission errors from April to mid-May 1992

| Classes        | Water | Marsh | Wet meadow | Woody/Shrub | Marginal total | Comission Error | Total Accuracy | Kappa Index |
|----------------|-------|-------|------------|-------------|----------------|-----------------|----------------|-------------|
| Water          | 51    | 5     | 4          | 0           | 60             | 0.15            | 86.7%          | 0.82        |
| Marsh          | 3     | 50    | 0          | 7           | 60             | 0.17            |                |             |
| Wet meadow     | 0     | 3     | 54         | 3           | 60             | 0.10            |                |             |
| Woody/Shrub    | 0     | 2     | 5          | 53          | 60             | 0.12            |                |             |
| Marginal total | 54    | 60    | 63         | 63          | 240            |                 |                |             |
| Omission Error | 0.06  | 0.17  | 0.14       | 0.16        |                |                 |                |             |

60

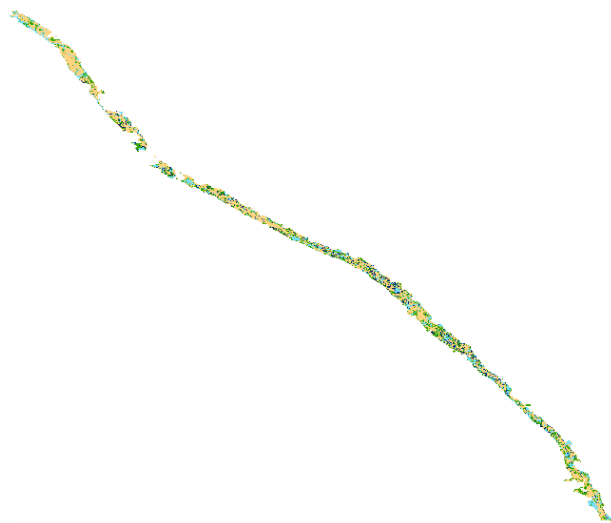

61

62

63



64

**Table S10.** Confusion Matrix with commission and omission errors from April to mid-May 1993

| Classes        | Water | Marsh | Wet meadow | Woody/ Shrub | Marginal total | Comission Error | Total Accuracy | Kappa Index |
|----------------|-------|-------|------------|--------------|----------------|-----------------|----------------|-------------|
| Water          | 50    | 5     | 5          | 0            | 60             | 0.17            | 85.4%          | 0.81        |
| Marsh          | 3     | 50    | 0          | 7            | 60             | 0.17            |                |             |
| Wet meadow     | 0     | 3     | 54         | 3            | 60             | 0.10            |                |             |
| Woody/Shrub    | 0     | 3     | 6          | 51           | 60             | 0.15            |                |             |
| Marginal total | 53    | 61    | 65         | 61           | 240            |                 |                |             |
| Omission Error | 0.06  | 0.18  | 0.17       | 0.16         |                |                 |                |             |

65

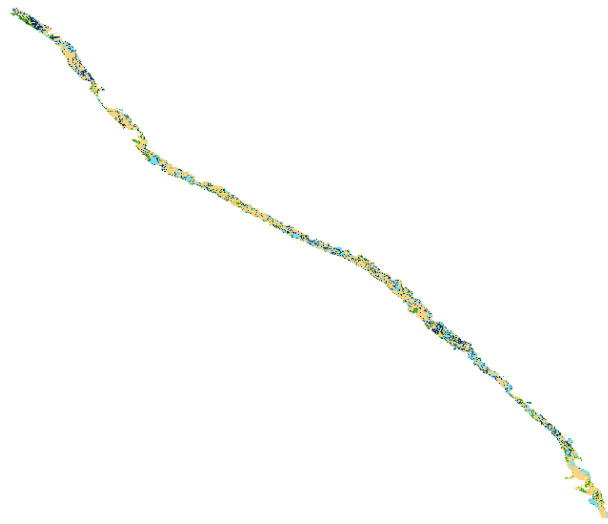

66

67

68

**Table S11.** Confusion Matrix with commission and omission errors from April to mid-May 1994

| Classes        | Water | Marsh | Wet meadow | Woody/Shrub | Marginal total | Comission Error | Total Accuracy | Kappa Index |
|----------------|-------|-------|------------|-------------|----------------|-----------------|----------------|-------------|
| Water          | 55    | 3     | 2          | 0           | 60             | 0.08            | 88.3%          | 0.84        |
| Marsh          | 1     | 54    | 0          | 5           | 60             | 0.10            |                |             |
| Wet meadow     | 0     | 4     | 52         | 4           | 60             | 0.13            |                |             |
| Woody/Shrub    | 0     | 4     | 5          | 51          | 60             | 0.15            |                |             |
| Marginal total | 56    | 65    | 59         | 60          | 240            |                 |                |             |
| Omission Error | 0.02  | 0.17  | 0.12       | 0.15        |                |                 |                |             |

69

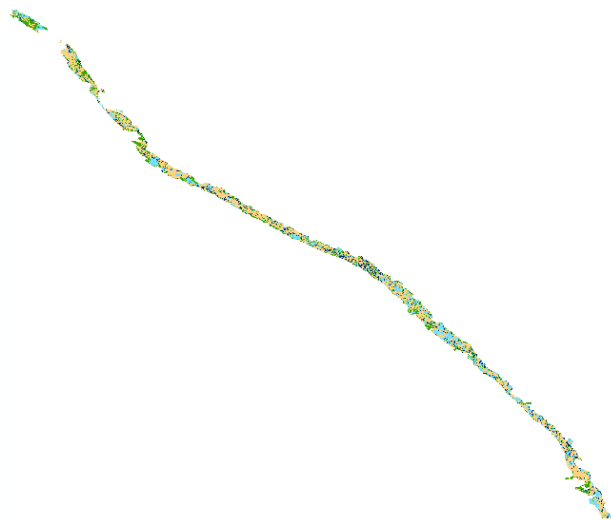

70

71

72

**Table S12.** Confusion Matrix with commission and omission errors from April to mid-May 1995

| Classes        | Water | Marsh | Wet meadow | Woody/Shrub | Marginal total | Comission Error | Total Accuracy | Kappa Index |
|----------------|-------|-------|------------|-------------|----------------|-----------------|----------------|-------------|
| Water          | 53    | 5     | 2          | 0           | 60             | 0.12            | 87.9%          | 0.84        |
| Marsh          | 1     | 53    | 1          | 5           | 60             | 0.12            |                |             |
| Wet meadow     | 0     | 5     | 50         | 5           | 60             | 0.17            |                |             |
| Woody/Shrub    | 0     | 3     | 2          | 55          | 60             | 0.08            |                |             |
| Marginal total | 54    | 66    | 55         | 65          | 240            |                 |                |             |
| Omission Error | 0.02  | 0.20  | 0.09       | 0.15        |                |                 |                |             |

73

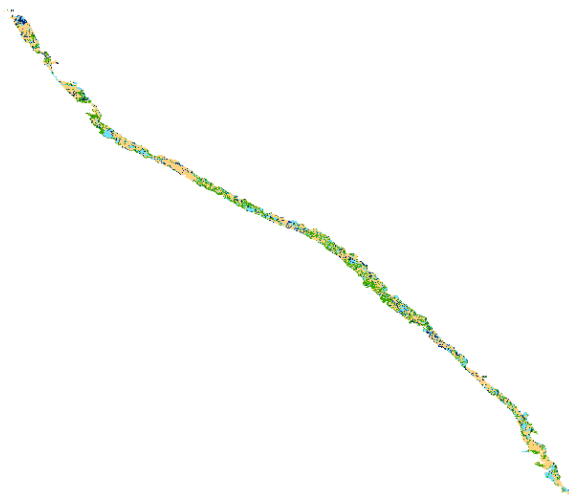

74

75

76

77

**Table S13.** Confusion Matrix with commission and omission errors from April to mid-May 1996

| Classes        | Water | Marsh | Wet meadow | Woody/Shrub | Marginal total | Comission Error | Total Accuracy | Kappa Index |
|----------------|-------|-------|------------|-------------|----------------|-----------------|----------------|-------------|
| Water          | 51    | 5     | 4          | 0           | 60             | 0.15            | 88.8%          | 0.85        |
| Marsh          | 1     | 57    | 1          | 1           | 60             | 0.05            |                |             |
| Wet meadow     | 1     | 3     | 55         | 1           | 60             | 0.08            |                |             |
| Woody/Shrub    | 0     | 5     | 5          | 50          | 60             | 0.17            |                |             |
| Marginal total | 53    | 70    | 65         | 52          | 240            |                 |                |             |
| Omission Error | 0.04  | 0.19  | 0.15       | 0.04        |                |                 |                |             |

78

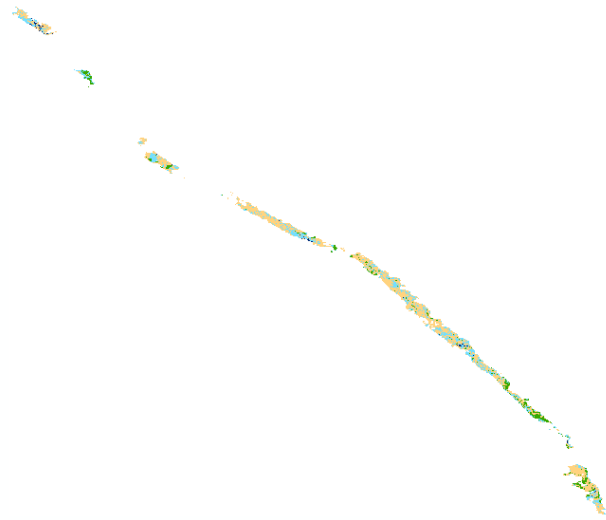

79

80

81

**Table S14.** Confusion Matrix with commission and omission errors from April to mid-May 1997

| Classes        | Water | Marsh | Wet meadow | Woody/Shrub | Marginal total | Comission Error | Total Accuracy | Kappa Index |
|----------------|-------|-------|------------|-------------|----------------|-----------------|----------------|-------------|
| Water          | 51    | 5     | 4          | 0           | 60             | 0.15            | 84.6%          | 0.79        |
| Marsh          | 3     | 49    | 2          | 6           | 60             | 0.18            |                |             |
| Wet meadow     | 1     | 4     | 50         | 5           | 60             | 0.17            |                |             |
| Woody/Shrub    | 0     | 4     | 3          | 53          | 60             | 0.12            |                |             |
| Marginal total | 55    | 62    | 59         | 64          | 240            |                 |                |             |
| Omission Error | 0.07  | 0.21  | 0.15       | 0.17        |                |                 |                |             |

82

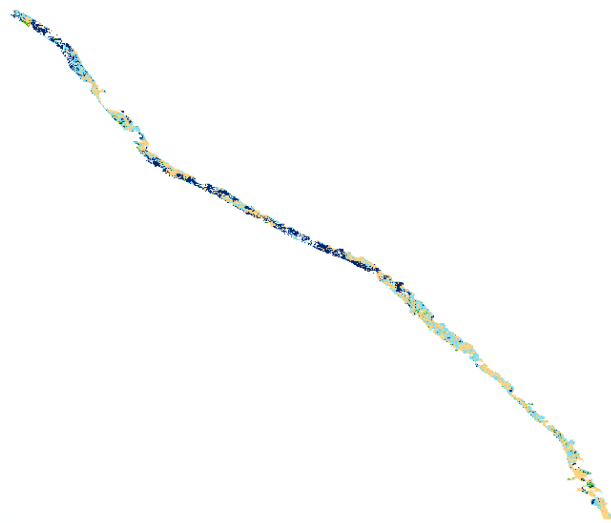

83

84

85

**Table S15.** Confusion Matrix with commission and omission errors from April to mid-May 1998

| Classes        | Water | Marsh | Wet meadow | Woody/Shrub | Marginal total | Comission Error | Total Accuracy | Kappa Index |
|----------------|-------|-------|------------|-------------|----------------|-----------------|----------------|-------------|
| Water          | 53    | 4     | 3          | 0           | 60             | 0.12            | 89.2%          | 0.86        |
| Marsh          | 1     | 55    | 0          | 4           | 60             | 0.08            |                |             |
| Wet meadow     | 0     | 4     | 52         | 4           | 60             | 0.13            |                |             |
| Woody/Shrub    | 0     | 2     | 4          | 54          | 60             | 0.10            |                |             |
| Marginal total | 54    | 65    | 59         | 62          | 240            |                 |                |             |
| Omission Error | 0.02  | 0.15  | 0.12       | 0.13        |                |                 |                |             |

86

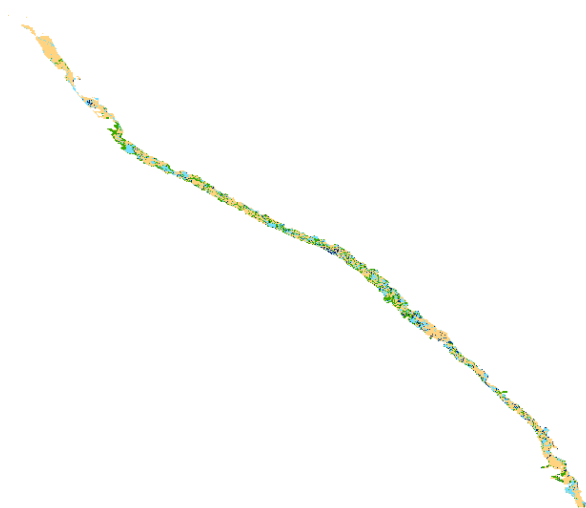

87

88

89

90

**Table S16.** Confusion Matrix with commission and omission errors from April to mid-May 1999

| Classes        | Water | Marsh | Wet meadow | Woody/Shrub | Marginal total | Comission Error | Total Accuracy | Kappa Index |
|----------------|-------|-------|------------|-------------|----------------|-----------------|----------------|-------------|
| Water          | 52    | 4     | 3          | 1           | 60             | 0.13            | 84.6%          | 0.79        |
| Marsh          | 1     | 53    | 1          | 5           | 60             | 0.12            |                |             |
| Wet meadow     | 1     | 5     | 50         | 4           | 60             | 0.17            |                |             |
| Woody/Shrub    | 1     | 5     | 6          | 48          | 60             | 0.20            |                |             |
| Marginal total | 55    | 67    | 60         | 58          | 240            |                 |                |             |
| Omission Error | 0.05  | 0.21  | 0.17       | 0.17        |                |                 |                |             |

91

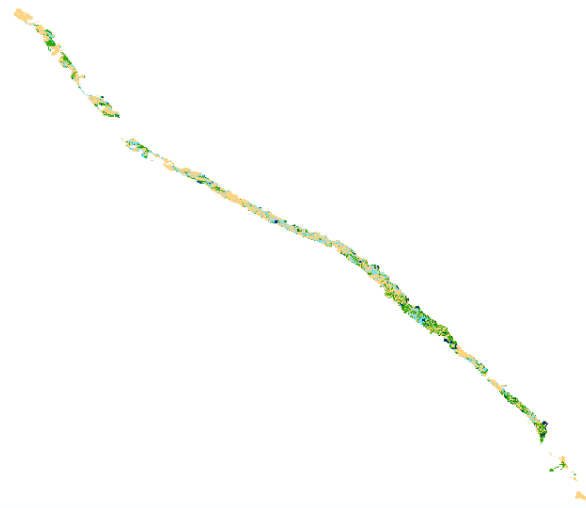

92

93

94

**Table S17.** Confusion Matrix with commission and omission errors from April to mid-May 2001

| Classes        | Water | Marsh | Wet meadow | Woody/Shrub | Marginal total | Comission Error | Total Accuracy | Kappa Index |
|----------------|-------|-------|------------|-------------|----------------|-----------------|----------------|-------------|
| Water          | 57    | 1     | 2          | 0           | 60             | 0.05            | 90.8%          | 0.88        |
| Marsh          | 1     | 51    | 2          | 6           | 60             | 0.15            |                |             |
| Wet meadow     | 0     | 3     | 55         | 2           | 60             | 0.08            |                |             |
| Woody/Shrub    | 0     | 2     | 3          | 55          | 60             | 0.08            |                |             |
| Marginal total | 58    | 57    | 62         | 63          | 240            |                 |                |             |
| Omission Error | 0.02  | 0.11  | 0.11       | 0.13        |                |                 |                |             |

95

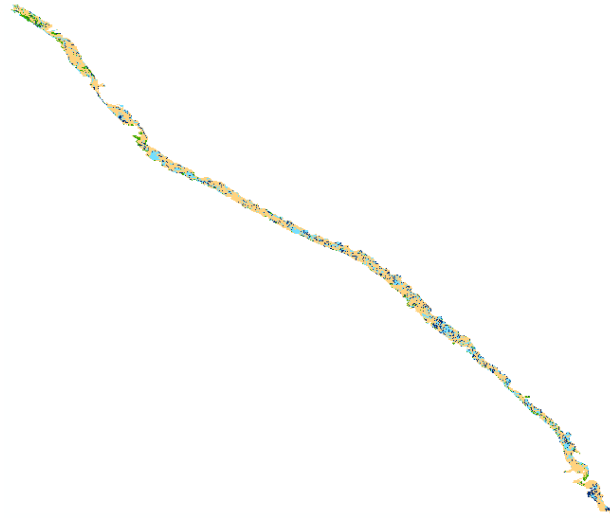

96

97

98

**Table S18.** Confusion Matrix with commission and omission errors from April to mid-May 2002

| Classes        | Water | Marsh | Wet meadow | Woody/Shrub | Marginal total | Comission Error | Total Accuracy | Kappa Index |
|----------------|-------|-------|------------|-------------|----------------|-----------------|----------------|-------------|
| Water          | 53    | 3     | 4          | 0           | 60             | 0.12            | 87.9%          | 0.84        |
| Marsh          | 1     | 52    | 0          | 7           | 60             | 0.13            |                |             |
| Wet meadow     | 0     | 4     | 52         | 4           | 60             | 0.13            |                |             |
| Woody/Shrub    | 0     | 4     | 2          | 54          | 60             | 0.10            |                |             |
| Marginal total | 54    | 63    | 58         | 65          | 240            |                 |                |             |
| Omission Error | 0.02  | 0.17  | 0.10       | 0.17        |                |                 |                |             |

99

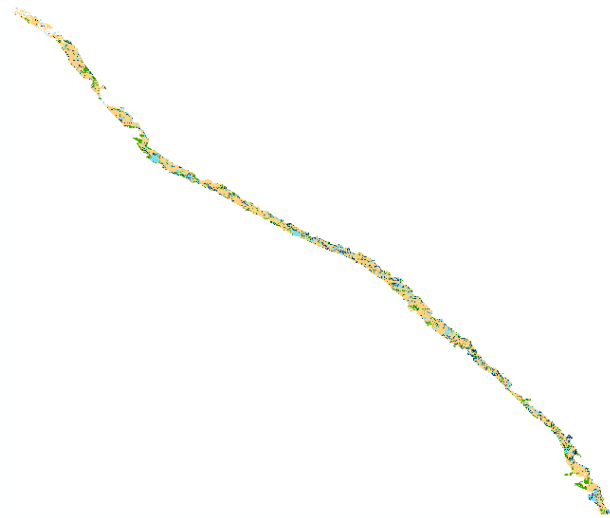

100

101

102

103

**Table S19.** Confusion Matrix with commission and omission errors from April to mid-May 2003

| Classes        | Water | Marsh | Wet meadow | Woody/Shrub | Marginal total | Comission Error | Total Accuracy | Kappa Index |
|----------------|-------|-------|------------|-------------|----------------|-----------------|----------------|-------------|
| Water          | 50    | 5     | 4          | 0           | 59             | 0.15            | 83.7%          | 0.78        |
| Marsh          | 1     | 51    | 3          | 5           | 60             | 0.15            |                |             |
| Wet meadow     | 0     | 4     | 50         | 6           | 60             | 0.17            |                |             |
| Woody/Shrub    | 0     | 6     | 5          | 49          | 60             | 0.18            |                |             |
| Marginal total | 51    | 66    | 62         | 60          | 239            |                 |                |             |
| Omission Error | 0.02  | 0.23  | 0.19       | 0.18        |                |                 |                |             |

104

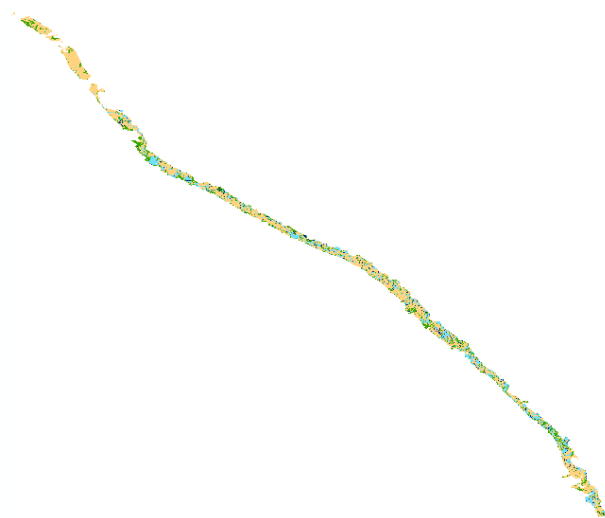

105

106

107

**Table S20.** Confusion Matrix with commission and omission errors from April to mid-May 2004

| Classes        | Water | Marsh | Wet meadow | Woody/Shrub | Marginal total | Comission Error | Total Accuracy | Kappa Index |
|----------------|-------|-------|------------|-------------|----------------|-----------------|----------------|-------------|
| Water          | 50    | 4     | 6          | 0           | 60             | 0.17            | 85.8%          | 0.81        |
| Marsh          | 1     | 51    | 1          | 7           | 60             | 0.15            |                |             |
| Wet meadow     | 0     | 4     | 52         | 4           | 60             | 0.13            |                |             |
| Woody/Shrub    | 0     | 4     | 3          | 53          | 60             | 0.12            |                |             |
| Marginal total | 51    | 63    | 62         | 64          | 240            |                 |                |             |
| Omission Error | 0.02  | 0.19  | 0.16       | 0.17        |                |                 |                |             |

108

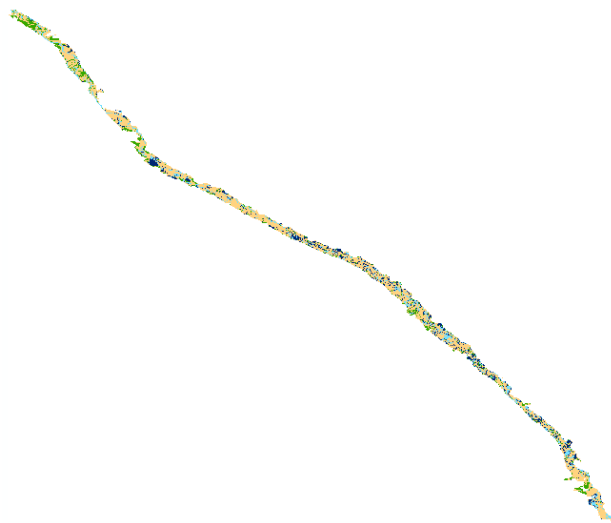

109

110

111

**Table S21.** Confusion Matrix with commission and omission errors from April to mid-May 2005

| Classes        | Water | Marsh | Wet meadow | Woody/Shrub | Marginal total | Comission Error | Total Accuracy | Kappa Index |
|----------------|-------|-------|------------|-------------|----------------|-----------------|----------------|-------------|
| Water          | 87    | 7     | 6          | 0           | 100            | 0.13            | 88.5%          | 0.85        |
| Marsh          | 5     | 88    | 7          | 0           | 100            | 0.12            |                |             |
| Wet meadow     | 2     | 3     | 91         | 4           | 100            | 0.09            |                |             |
| Woody/Shrub    | 0     | 8     | 4          | 88          | 100            | 0.12            |                |             |
| Marginal total | 94    | 106   | 108        | 92          | 400            |                 |                |             |
| Omission Error | 0.07  | 0.17  | 0.16       | 0.04        |                |                 |                |             |

112

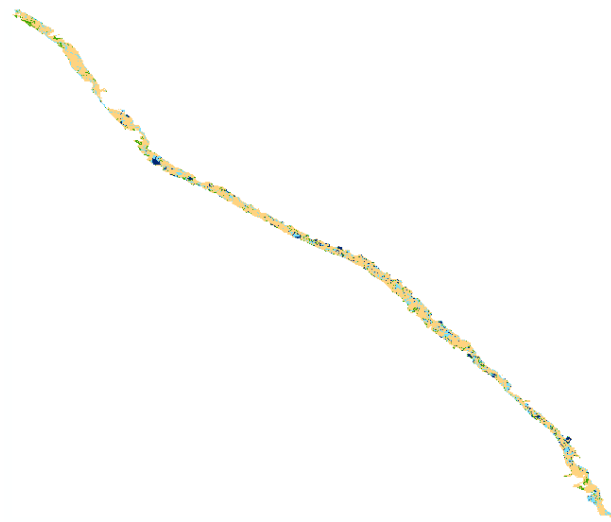

113

114

115



116

**Table S22.** Confusion Matrix with commission and omission errors from April to mid-May 2006

| Classes        | Water | Marsh | Wet meadow | Woody/Shrub | Marginal total | Comission Error | Total Accuracy | Kappa Index |
|----------------|-------|-------|------------|-------------|----------------|-----------------|----------------|-------------|
| Water          | 50    | 5     | 5          | 0           | 60             | 0.17            | 86.3%          | 0.82        |
| Marsh          | 1     | 54    | 0          | 5           | 60             | 0.10            |                |             |
| Wet meadow     | 0     | 4     | 52         | 4           | 60             | 0.13            |                |             |
| Woody/Shrub    | 0     | 4     | 5          | 51          | 60             | 0.15            |                |             |
| Marginal total | 51    | 67    | 62         | 60          | 240            |                 |                |             |
| Omission Error | 0.02  | 0.19  | 0.16       | 0.15        |                |                 |                |             |

117

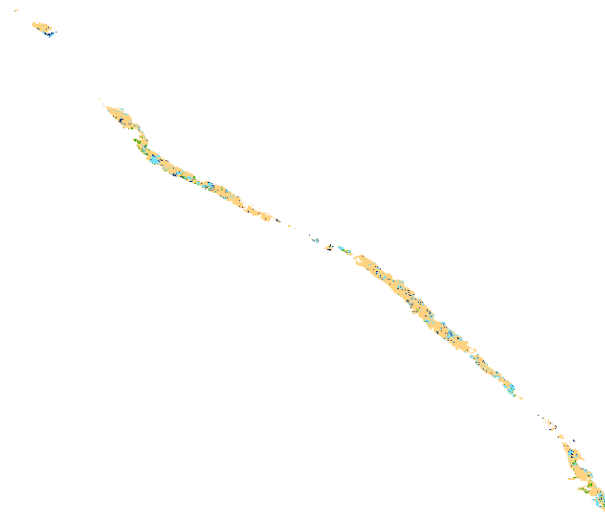

118

119

120

**Table S23.** Confusion Matrix with commission and omission errors from April to mid-May 2007

| Classes        | Water | Marsh | Wet meadow | Woody/Shrub | Marginal total | Comission Error | Total Accuracy | Kappa Index |
|----------------|-------|-------|------------|-------------|----------------|-----------------|----------------|-------------|
| Water          | 89    | 6     | 5          | 0           | 100            | 0.11            | 89.0%          | 0.85        |
| Marsh          | 3     | 93    | 3          | 1           | 100            | 0.07            |                |             |
| Wet meadow     | 2     | 6     | 88         | 4           | 100            | 0.12            |                |             |
| Woody/Shrub    | 0     | 8     | 6          | 86          | 100            | 0.14            |                |             |
| Marginal total | 94    | 113   | 102        | 91          | 400            |                 |                |             |
| Omission Error | 0.05  | 0.18  | 0.14       | 0.05        |                |                 |                |             |

121

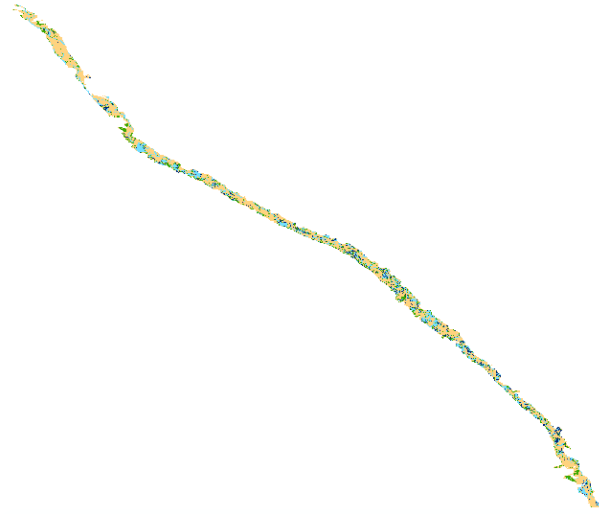

122

123

124

**Table S24.** Confusion Matrix with commission and omission errors from April to mid-May 2008

| Classes        | Water | Marsh | Wet meadow | Woody/Shrub | Marginal total | Comission Error | Total Accuracy | Kappa Index |
|----------------|-------|-------|------------|-------------|----------------|-----------------|----------------|-------------|
| Water          | 54    | 5     | 1          | 0           | 60             | 0.10            | 88.3%          | 0.84        |
| Marsh          | 1     | 53    | 0          | 5           | 59             | 0.10            |                |             |
| Wet meadow     | 0     | 4     | 55         | 1           | 60             | 0.08            |                |             |
| Woody/Shrub    | 2     | 4     | 5          | 49          | 60             | 0.18            |                |             |
| Marginal total | 57    | 66    | 61         | 55          | 239            |                 |                |             |
| Omission Error | 0.05  | 0.20  | 0.10       | 0.11        |                |                 |                |             |

125

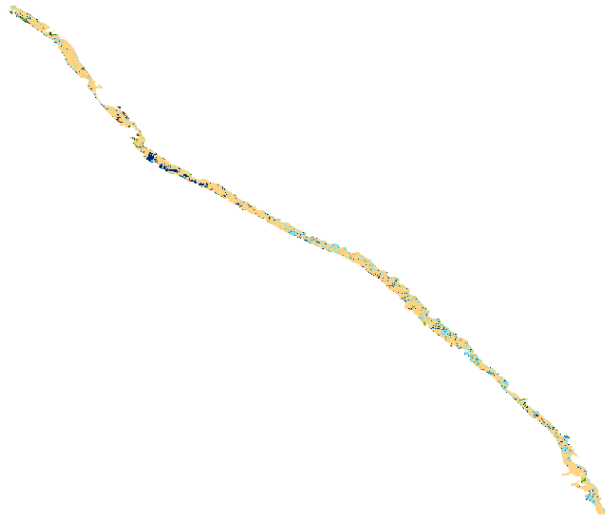

126

127

128

129

**Table S25.** Confusion Matrix with commission and omission errors from April to mid-May 2009

| Classes        | Water | Marsh | Wet meadow | Woody/Shrub | Marginal total | Comission Error | Total Accuracy | Kappa Index |
|----------------|-------|-------|------------|-------------|----------------|-----------------|----------------|-------------|
| Water          | 88    | 4     | 8          | 0           | 100            | 0.12            | 87.8%          | 0.84        |
| Marsh          | 2     | 91    | 3          | 4           | 100            | 0.09            |                |             |
| Wet meadow     | 4     | 5     | 83         | 8           | 100            | 0.17            |                |             |
| Woody/Shrub    | 0     | 2     | 9          | 89          | 100            | 0.11            |                |             |
| Marginal total | 94    | 102   | 103        | 101         | 400            |                 |                |             |
| Omission Error | 0.06  | 0.11  | 0.19       | 0.12        |                |                 |                |             |

130

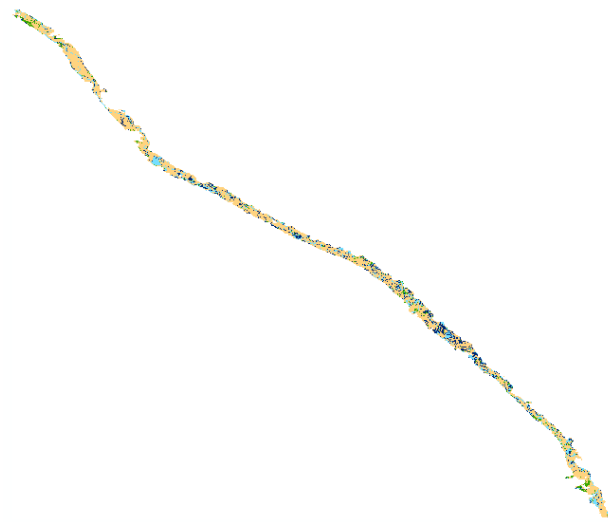

131

132

133

**Table S26.** Confusion Matrix with commission and omission errors from April to mid-May 2010

| Classes        | Water | Marsh | Wet meadow | Woody/Shrub | Marginal total | Comission Error | Total Accuracy | Kappa Index |
|----------------|-------|-------|------------|-------------|----------------|-----------------|----------------|-------------|
| Water          | 50    | 5     | 5          | 0           | 60             | 0.17            | 82.1%          | 0.76        |
| Marsh          | 1     | 49    | 0          | 10          | 60             | 0.18            |                |             |
| Wet meadow     | 2     | 6     | 48         | 4           | 60             | 0.20            |                |             |
| Woody/Shrub    | 1     | 4     | 5          | 50          | 60             | 0.17            |                |             |
| Marginal total | 54    | 64    | 58         | 64          | 240            |                 |                |             |
| Omission Error | 0.07  | 0.23  | 0.17       | 0.22        |                |                 |                |             |

134

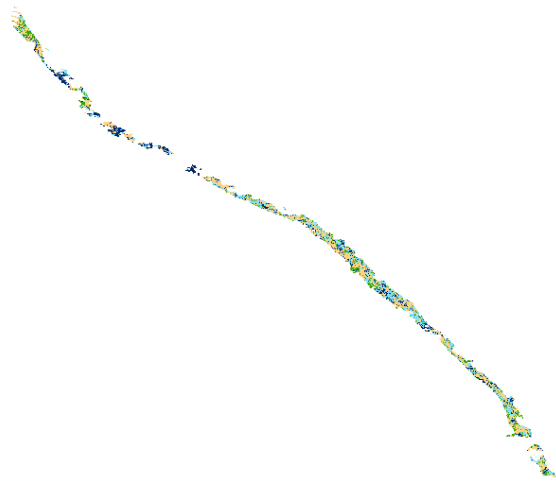

135

136

137

**Table S27.** Confusion Matrix with commission and omission errors from April to mid-May 2011

| Classes        | Water | Marsh | Wet meadow | Woody/Shrub | Marginal total | Comission Error | Total Accuracy | Kappa Index |
|----------------|-------|-------|------------|-------------|----------------|-----------------|----------------|-------------|
| Water          | 52    | 5     | 3          | 0           | 60             | 0.13            | 85.4%          | 0.81        |
| Marsh          | 1     | 54    | 0          | 5           | 60             | 0.10            |                |             |
| Wet meadow     | 0     | 4     | 50         | 6           | 60             | 0.17            |                |             |
| Woody/Shrub    | 0     | 4     | 7          | 49          | 60             | 0.18            |                |             |
| Marginal total | 53    | 67    | 60         | 60          | 240            |                 |                |             |
| Omission Error | 0.02  | 0.19  | 0.17       | 0.18        |                |                 |                |             |

138

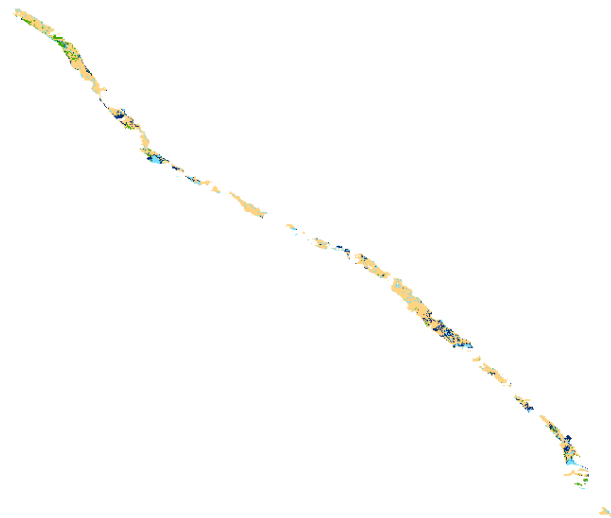

139

140

141

142

**Table S28.** Confusion Matrix with commission and omission errors from April to mid-May 2013

| Classes        | Water | Marsh | Wet meadow | Woody/Shrub | Marginal total | Comission Error | Total Accuracy | Kappa Index |
|----------------|-------|-------|------------|-------------|----------------|-----------------|----------------|-------------|
| Water          | 50    | 5     | 4          | 1           | 60             | 0.17            | 87.6%          | 0.83        |
| Marsh          | 1     | 55    | 0          | 4           | 60             | 0.08            |                |             |
| Wet meadow     | 0     | 4     | 54         | 4           | 62             | 0.13            |                |             |
| Woody/Shrub    | 1     | 1     | 5          | 53          | 60             | 0.12            |                |             |
| Marginal total | 52    | 65    | 63         | 62          | 242            |                 |                |             |
| Omission Error | 0.04  | 0.15  | 0.14       | 0.15        |                |                 |                |             |

143

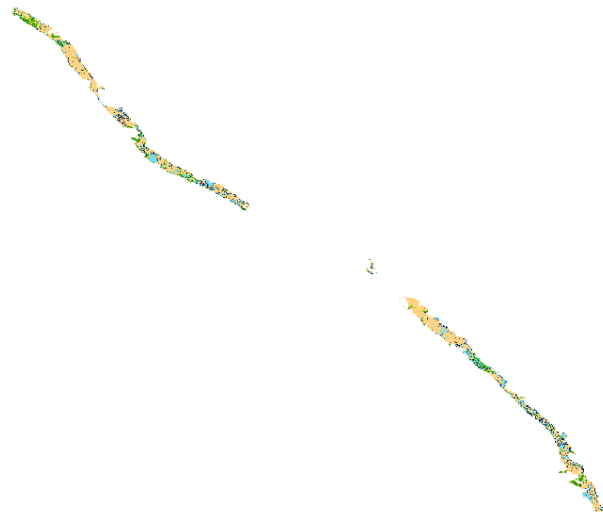

144

145

146

**Table S29.** Confusion Matrix with commission and omission errors from April to mid-May 2014

| Classes        | Water | Marsh | Wet meadow | Woody/Shrub | Marginal total | Comission Error | Total Accuracy | Kappa Index |
|----------------|-------|-------|------------|-------------|----------------|-----------------|----------------|-------------|
| Water          | 50    | 5     | 4          | 1           | 60             | 0.17            | 86.3%          | 0.82        |
| Marsh          | 1     | 57    | 1          | 1           | 60             | 0.05            |                |             |
| Wet meadow     | 0     | 5     | 50         | 5           | 60             | 0.17            |                |             |
| Woody/Shrub    | 1     | 4     | 5          | 50          | 60             | 0.17            |                |             |
| Marginal total | 52    | 71    | 60         | 57          | 240            |                 |                |             |
| Omission Error | 0.04  | 0.20  | 0.17       | 0.12        |                |                 |                |             |

147

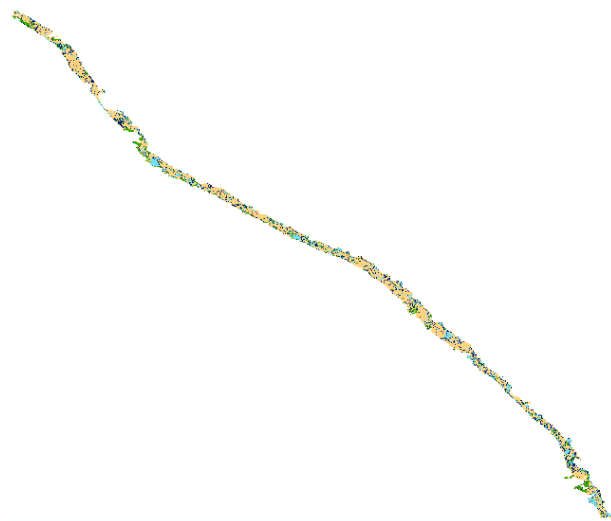

148

149

150

**Table S30.** Confusion Matrix with commission and omission errors from April to mid-May 2015

| Classes        | Water | Marsh | Wet meadow | Woody/Shrub | Marginal total | Comission Error | Total Accuracy | Kappa Index |
|----------------|-------|-------|------------|-------------|----------------|-----------------|----------------|-------------|
| Water          | 51    | 5     | 4          | 0           | 60             | 0.15            | 85.0%          | 0.80        |
| Marsh          | 2     | 53    | 0          | 5           | 60             | 0.12            |                |             |
| Wet meadow     | 0     | 4     | 50         | 6           | 60             | 0.17            |                |             |
| Woody/Shrub    | 0     | 5     | 5          | 50          | 60             | 0.17            |                |             |
| Marginal total | 53    | 67    | 59         | 61          | 240            |                 |                |             |
| Omission Error | 0.04  | 0.21  | 0.15       | 0.18        |                |                 |                |             |

151

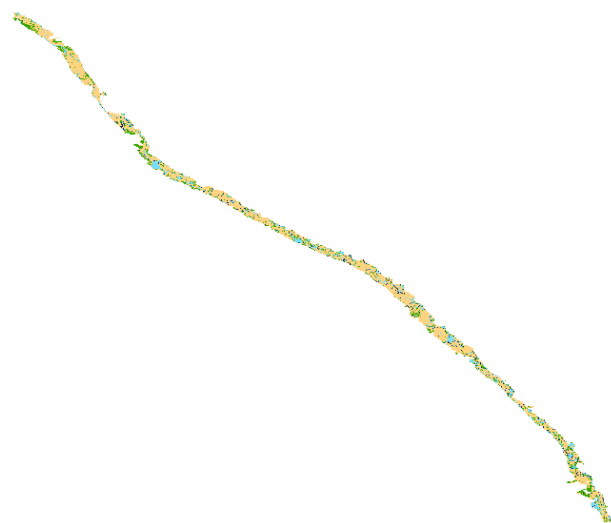

152

153

154

155

**Table S31.** Confusion Matrix with commission and omission errors from April to mid-May 2016

| Classes        | Water | Marsh | Wet meadow | Woody/Shrub | Marginal total | Comission Error | Total Accuracy | Kappa Index |
|----------------|-------|-------|------------|-------------|----------------|-----------------|----------------|-------------|
| Water          | 89    | 3     | 8          | 0           | 100            | 0.11            | 90.0%          | 0.87        |
| Marsh          | 3     | 92    | 5          | 0           | 100            | 0.08            |                |             |
| Wet meadow     | 4     | 4     | 89         | 3           | 100            | 0.11            |                |             |
| Woody/Shrub    | 0     | 3     | 7          | 90          | 100            | 0.10            |                |             |
| Marginal total | 96    | 102   | 109        | 93          | 400            |                 |                |             |
| Omission Error | 0.07  | 0.10  | 0.18       | 0.03        |                |                 |                |             |

156

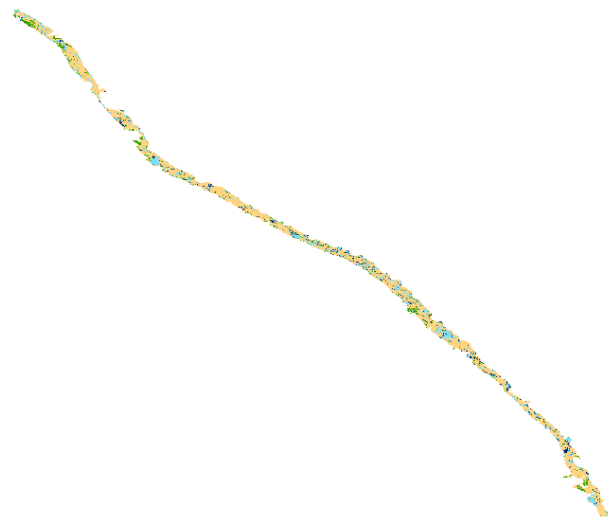

157

158

159

**Table S32.** Confusion Matrix with commission and omission errors from April to mid-May 2017

| Classes        | Water | Marsh | Wet meadow | Woody/Shrub | Marginal total | Comission Error | Total Accuracy | Kappa Index |
|----------------|-------|-------|------------|-------------|----------------|-----------------|----------------|-------------|
| Water          | 91    | 2     | 7          | 0           | 100            | 0.09            | 88.0%          | 0.84        |
| Marsh          | 3     | 87    | 10         | 0           | 100            | 0.13            |                |             |
| Wet meadow     | 5     | 5     | 88         | 2           | 100            | 0.12            |                |             |
| Woody/Shrub    | 0     | 4     | 10         | 86          | 100            | 0.14            |                |             |
| Marginal total | 99    | 98    | 115        | 88          | 400            |                 |                |             |
| Omission Error | 0.08  | 0.11  | 0.23       | 0.02        |                |                 |                |             |

160

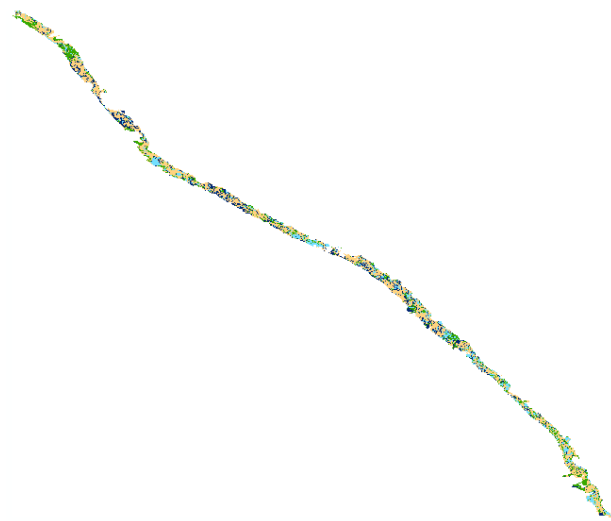

161

162

163

**Table S33.** Confusion Matrix with commission and omission errors from April to mid-May 2018

| Classes        | Water | Marsh | Wet meadow | Woody/Shrub | Marginal total | Comission Error | Total Accuracy | Kappa Index |
|----------------|-------|-------|------------|-------------|----------------|-----------------|----------------|-------------|
| Water          | 88    | 4     | 8          | 0           | 100            | 0.12            | 86.5%          | 0.82        |
| Marsh          | 2     | 89    | 9          | 0           | 100            | 0.11            |                |             |
| Wet meadow     | 5     | 7     | 85         | 3           | 100            | 0.15            |                |             |
| Woody/Shrub    | 0     | 5     | 11         | 84          | 100            | 0.16            |                |             |
| Marginal total | 95    | 105   | 113        | 87          | 400            |                 |                |             |
| Omission Error | 0.07  | 0.15  | 0.25       | 0.03        |                |                 |                |             |

164

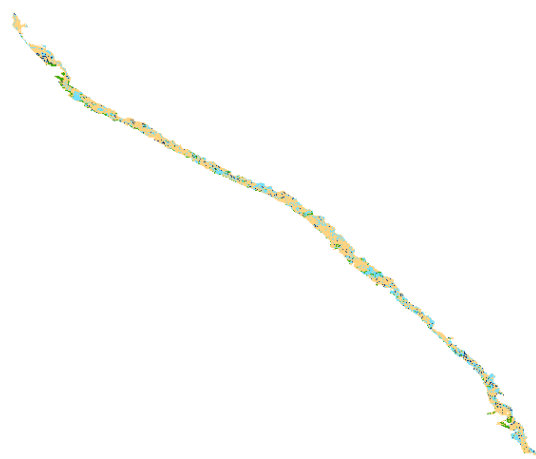

165

166

167



168

**Table S34.** Confusion Matrix with commission and omission errors from April to mid-May 2019

| Classes        | Water | Marsh | Wet meadow | Woody/Shrub | Marginal total | Comission Error | Total Accuracy | Kappa Index |
|----------------|-------|-------|------------|-------------|----------------|-----------------|----------------|-------------|
| Water          | 90    | 3     | 7          | 0           | 100            | 0.10            | 89.3%          | 0.86        |
| Marsh          | 2     | 91    | 7          | 0           | 100            | 0.09            |                |             |
| Wet meadow     | 4     | 7     | 87         | 2           | 100            | 0.13            |                |             |
| Woody/Shrub    | 0     | 3     | 8          | 89          | 100            | 0.11            |                |             |
| Marginal total | 96    | 104   | 109        | 91          | 400            |                 |                |             |
| Omission Error | 0.06  | 0.13  | 0.20       | 0.02        |                |                 |                |             |

169

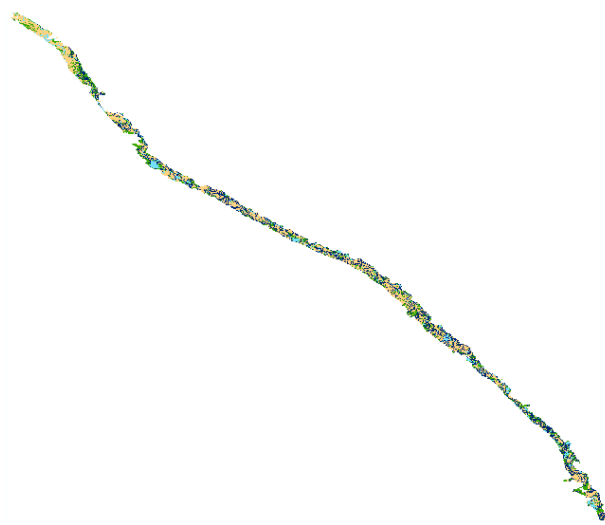

170

171

172

**Table S35.** Confusion Matrix with commission and omission errors from April to mid-May 2020

| Classes        | Water | Marsh | Wet meadow | Woody/Shrub | Marginal total | Comission Error | Total Accuracy | Kappa Index |
|----------------|-------|-------|------------|-------------|----------------|-----------------|----------------|-------------|
| Water          | 88    | 4     | 8          | 0           | 100            | 0.12            | 87.5%          | 0.83        |
| Marsh          | 6     | 89    | 5          | 0           | 100            | 0.11            |                |             |
| Wet meadow     | 5     | 8     | 85         | 2           | 100            | 0.15            |                |             |
| Woody/Shrub    | 0     | 6     | 6          | 88          | 100            | 0.12            |                |             |
| Marginal total | 99    | 107   | 104        | 90          | 400            |                 |                |             |
| Omission Error | 0.11  | 0.17  | 0.18       | 0.02        |                |                 |                |             |

173

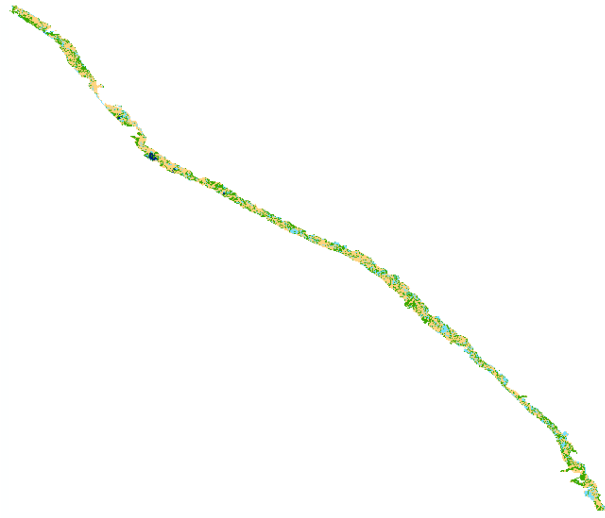

174

175

176

**Table S36.** Confusion Matrix with commission and omission errors from April to mid-May 2021

| Classes        | Water | Marsh | Wet meadow | Woody/Shrub | Marginal total | Comission Error | Total Accuracy | Kappa Index |
|----------------|-------|-------|------------|-------------|----------------|-----------------|----------------|-------------|
| Water          | 88    | 5     | 7          | 0           | 100            | 0.12            | 88.3%          | 0.84        |
| Marsh          | 6     | 88    | 6          | 0           | 100            | 0.12            |                |             |
| Wet meadow     | 3     | 5     | 90         | 2           | 100            | 0.10            |                |             |
| Woody/Shrub    | 0     | 6     | 7          | 87          | 100            | 0.13            |                |             |
| Marginal total | 97    | 104   | 110        | 89          | 400            |                 |                |             |
| Omission Error | 0.09  | 0.15  | 0.18       | 0.02        |                |                 |                |             |

177

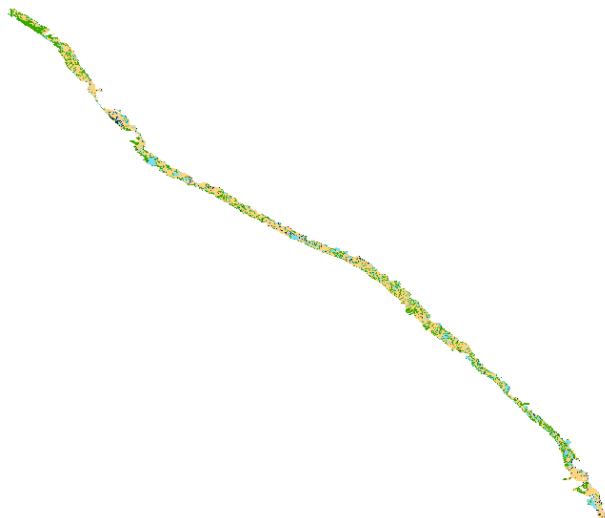

178

179

180

181

**Table S37.** Confusion Matrix with commission and omission errors from April to mid-May 2022

| Classes        | Water | Marsh | Wet meadow | Woody/Shrub | Marginal total | Comission Error | Total Accuracy | Kappa Index |
|----------------|-------|-------|------------|-------------|----------------|-----------------|----------------|-------------|
| Water          | 90    | 4     | 6          | 0           | 100            | 0.10            | 89.8%          | 0.86        |
| Marsh          | 3     | 92    | 5          | 0           | 100            | 0.08            |                |             |
| Wet meadow     | 4     | 4     | 88         | 4           | 100            | 0.12            |                |             |
| Woody/Shrub    | 0     | 5     | 6          | 89          | 100            | 0.11            |                |             |
| Marginal total | 97    | 105   | 105        | 93          | 400            |                 |                |             |
| Omission Error | 0.07  | 0.12  | 0.16       | 0.04        |                |                 |                |             |

182

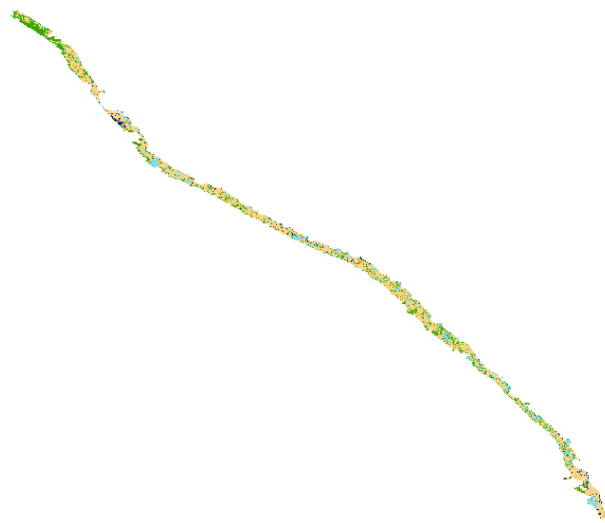

183

184

**2.2. Season: Late-May to July**

186

**Table S38.** Confusion Matrix with commission and omission errors from late-May to July 1984

| Classes        | Water | Marsh | Wet meadow | Woody/Shrub | Marginal total | Comission Error | Total Accuracy | Kappa Index |
|----------------|-------|-------|------------|-------------|----------------|-----------------|----------------|-------------|
| Water          | 97    | 3     | 0          | 0           | 100            | 0.03            | 91.3%          | 0.88        |
| Marsh          | 6     | 89    | 5          | 0           | 100            | 0.11            |                |             |
| Wet meadow     | 0     | 4     | 93         | 3           | 100            | 0.07            |                |             |
| Woody/Shrub    | 0     | 6     | 8          | 86          | 100            | 0.14            |                |             |
| Marginal total | 103   | 102   | 106        | 89          | 400            |                 |                |             |
| Omission Error | 0.06  | 0.13  | 0.12       | 0.03        |                |                 |                |             |

188

189

190

191

**Table S39.** Confusion Matrix with commission and omission errors from late-May to July 1986

| Classes        | Water | Marsh | Wet meadow | Woody/Shrub | Marginal total | Comission Error | Total Accuracy | Kappa Index |
|----------------|-------|-------|------------|-------------|----------------|-----------------|----------------|-------------|
| Water          | 92    | 4     | 4          | 0           | 100            | 0.08            |                |             |
| Marsh          | 2     | 89    | 9          | 0           | 100            | 0.11            |                |             |
| Wet meadow     | 3     | 6     | 90         | 1           | 100            | 0.10            | 89.8%          | 0.86        |
| Woody/Shrub    | 0     | 2     | 10         | 88          | 100            | 0.12            |                |             |
| Marginal total | 97    | 101   | 113        | 89          | 400            |                 |                |             |
| Omission Error | 0.05  | 0.12  | 0.20       | 0.01        |                |                 |                |             |

192

193

194

195

196

**Table S40.** Confusion Matrix with commission and omission errors from late-May to July 1987

| Classes        | Water | Marsh | Wet meadow | Woody/Shrub | Marginal total | Comission Error | Total Accuracy | Kappa Index |
|----------------|-------|-------|------------|-------------|----------------|-----------------|----------------|-------------|
| Water          | 94    | 4     | 2          | 0           | 100            | 0.06            | 88.0%          | 0.84        |
| Marsh          | 10    | 80    | 10         | 0           | 100            | 0.20            |                |             |
| Wet meadow     | 0     | 10    | 87         | 3           | 100            | 0.13            |                |             |
| Woody/Shrub    | 0     | 6     | 3          | 91          | 100            | 0.09            |                |             |
| Marginal total | 104   | 100   | 102        | 94          | 400            |                 |                |             |
| Omission Error | 0.10  | 0.20  | 0.15       | 0.03        |                |                 |                |             |

197

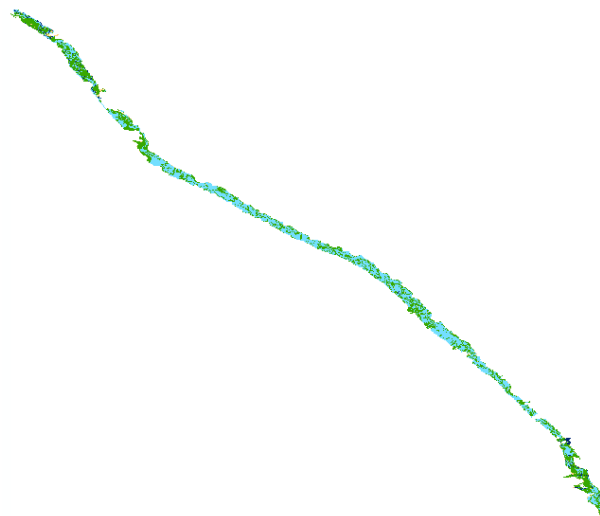

198

199

200

**Table S41.** Confusion Matrix with commission and omission errors from late-May to July 1988

| Classes        | Water | Marsh | Wet meadow | Woody/Shrub | Marginal total | Comission Error | Total Accuracy | Kappa Index |
|----------------|-------|-------|------------|-------------|----------------|-----------------|----------------|-------------|
| Water          | 95    | 5     | 0          | 0           | 100            | 0.05            | 87.8%          | 0.84        |
| Marsh          | 0     | 82    | 12         | 6           | 100            | 0.18            |                |             |
| Wet meadow     | 0     | 9     | 83         | 8           | 100            | 0.17            |                |             |
| Woody/Shrub    | 0     | 4     | 5          | 91          | 100            | 0.09            |                |             |
| Marginal total | 95    | 100   | 100        | 105         | 400            |                 |                |             |
| Omission Error | 0     | 0.18  | 0.17       | 0.13        |                |                 |                |             |

201

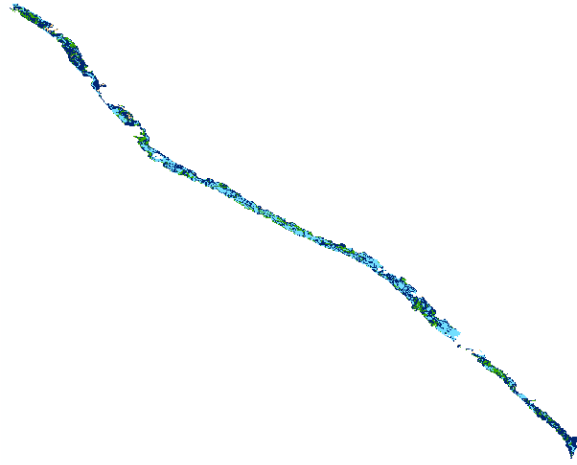

202

203

204

**Table S42.** Confusion Matrix with commission and omission errors from late-May to July 1990

| Classes        | Water | Marsh | Wet meadow | Woody/Shrub | Marginal total | Comission Error | Total Accuracy | Kappa Index |
|----------------|-------|-------|------------|-------------|----------------|-----------------|----------------|-------------|
| Water          | 94    | 2     | 4          | 0           | 100            | 0.06            |                |             |
| Marsh          | 2     | 88    | 3          | 7           | 100            | 0.12            |                |             |
| Wet meadow     | 1     | 9     | 88         | 2           | 100            | 0.12            | 90.0%          | 0.87        |
| Woody/Shrub    | 0     | 4     | 6          | 90          | 100            | 0.10            |                |             |
| Marginal total | 97    | 103   | 101        | 99          | 400            |                 |                |             |
| Omission Error | 0.03  | 0.15  | 0.13       | 0.09        |                |                 |                |             |

205

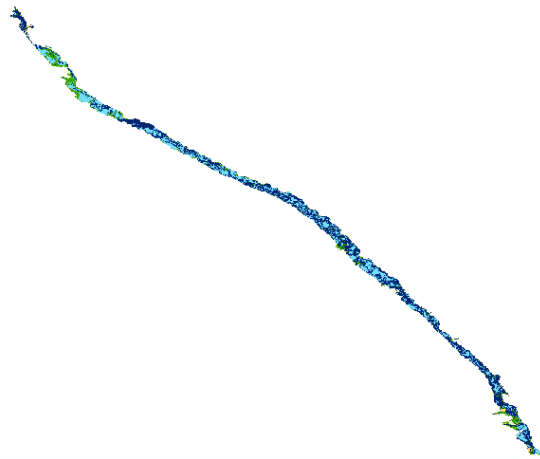

206

207

208

209

**Table S43.** Confusion Matrix with commission and omission errors from late-May to July 1991

| Classes        | Water | Marsh | Wet meadow | Woody/Shrub | Marginal total | Comission Error | Total Accuracy | Kappa Index |
|----------------|-------|-------|------------|-------------|----------------|-----------------|----------------|-------------|
| Water          | 90    | 6     | 4          | 0           | 100            | 0.10            | 89.0%          | 0.85        |
| Marsh          | 6     | 86    | 4          | 4           | 100            | 0.14            |                |             |
| Wet meadow     | 0     | 7     | 91         | 2           | 100            | 0.09            |                |             |
| Woody/Shrub    | 0     | 7     | 4          | 89          | 100            | 0.11            |                |             |
| Marginal total | 96    | 106   | 103        | 95          | 400            |                 |                |             |
| Omission Error | 0.06  | 0.19  | 0.12       | 0.06        |                |                 |                |             |

210

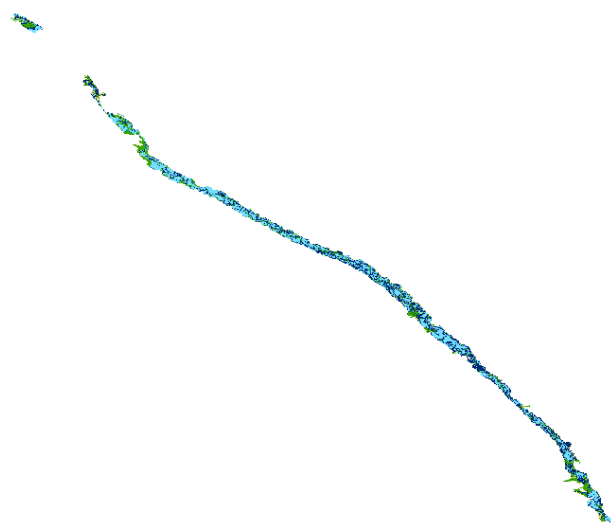

211

212

213

**Table S44.** Confusion Matrix with commission and omission errors from late-May to July 1992

| Classes        | Water | Marsh | Wet meadow | Woody/Shrub | Marginal total | Comission Error | Total Accuracy | Kappa Index |
|----------------|-------|-------|------------|-------------|----------------|-----------------|----------------|-------------|
| Water          | 55    | 1     | 4          | 0           | 60             | 0.08            | 90.8%          | 0.88        |
| Marsh          | 1     | 56    | 0          | 3           | 60             | 0.07            |                |             |
| Wet meadow     | 0     | 4     | 53         | 3           | 60             | 0.12            |                |             |
| Woody/Shrub    | 0     | 3     | 3          | 54          | 60             | 0.10            |                |             |
| Marginal total | 56    | 64    | 60         | 60          | 240            |                 |                |             |
| Omission Error | 0.02  | 0.13  | 0.12       | 0.10        |                |                 |                |             |

214

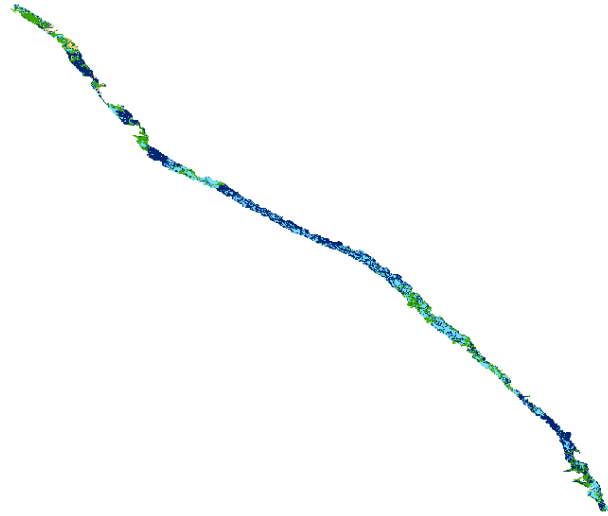

215

216

217

**Table S45.** Confusion Matrix with commission and omission errors from late-May to July 1993

| Classes        | Water | Marsh | Wet meadow | Woody/Shrub | Marginal total | Comission Error | Total Accuracy | Kappa Index |
|----------------|-------|-------|------------|-------------|----------------|-----------------|----------------|-------------|
| Water          | 56    | 1     | 3          | 0           | 60             | 0.07            | 90.4%          | 0.87        |
| Marsh          | 1     | 57    | 0          | 2           | 60             | 0.05            |                |             |
| Wet meadow     | 0     | 2     | 54         | 4           | 60             | 0.10            |                |             |
| Woody/Shrub    | 0     | 5     | 5          | 50          | 60             | 0.17            |                |             |
| Marginal total | 57    | 65    | 62         | 56          | 240            |                 |                |             |
| Omission Error | 0.02  | 0.12  | 0.13       | 0.11        |                |                 |                |             |

218

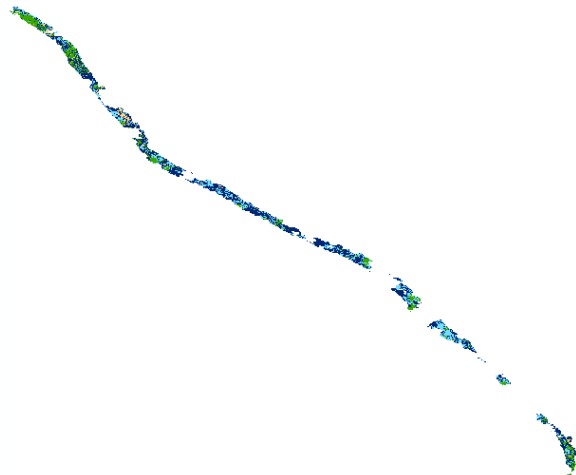

219

220

221



222

**Table S46.** Confusion Matrix with commission and omission errors from late-May to July 1994

| Classes        | Water | Marsh | Wet meadow | Woody/Shrub | Marginal total | Comission Error | Total Accuracy | Kappa Index |
|----------------|-------|-------|------------|-------------|----------------|-----------------|----------------|-------------|
| Water          | 57    | 1     | 2          | 0           | 60             | 0.05            | 90.4%          | 0.87        |
| Marsh          | 1     | 55    | 4          | 0           | 60             | 0.08            |                |             |
| Wet meadow     | 0     | 3     | 54         | 3           | 60             | 0.10            |                |             |
| Woody/Shrub    | 0     | 4     | 5          | 51          | 60             | 0.15            |                |             |
| Marginal total | 58    | 63    | 65         | 54          | 240            |                 |                |             |
| Omission Error | 0.02  | 0.13  | 0.17       | 0.06        |                |                 |                |             |

223

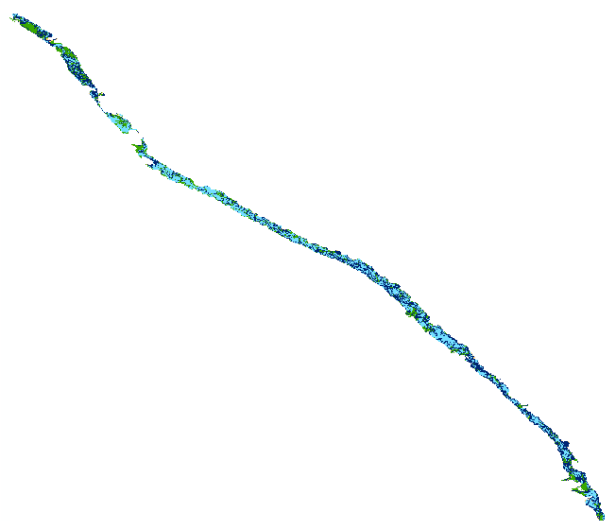

224

225

226

**Table S47.** Confusion Matrix with commission and omission errors from late-May to July 1995

| Classes        | Water | Marsh | Wet meadow | Woody/Shrub | Marginal total | Comission Error | Total Accuracy | Kappa Index |
|----------------|-------|-------|------------|-------------|----------------|-----------------|----------------|-------------|
| Water          | 56    | 3     | 1          | 0           | 60             | 0.07            | 89.6%          | 0.86        |
| Marsh          | 1     | 55    | 0          | 4           | 60             | 0.08            |                |             |
| Wet meadow     | 0     | 4     | 52         | 4           | 60             | 0.13            |                |             |
| Woody/Shrub    | 0     | 4     | 4          | 52          | 60             | 0.13            |                |             |
| Marginal total | 57    | 66    | 57         | 60          | 240            |                 |                |             |
| Omission Error | 0.02  | 0.17  | 0.09       | 0.13        |                |                 |                |             |

227

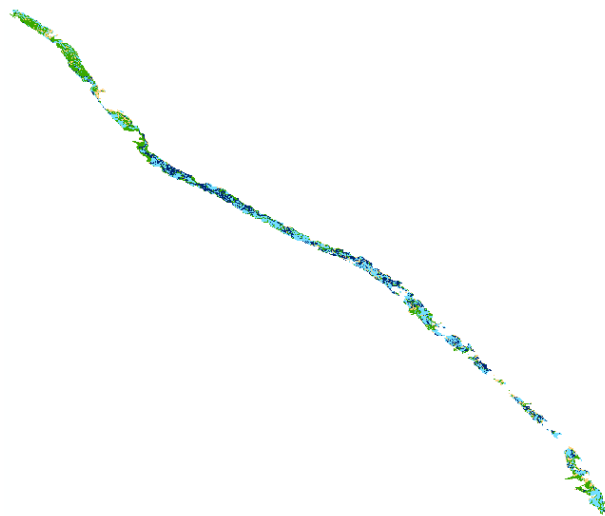

228

229

230

**Table S48.** Confusion Matrix with commission and omission errors from late-May to July 1996

| Classes        | Water | Marsh | Wet meadow | Woody/Shrub | Marginal total | Comission Error | Total Accuracy | Kappa Index |
|----------------|-------|-------|------------|-------------|----------------|-----------------|----------------|-------------|
| Water          | 54    | 3     | 3          | 0           | 60             | 0.10            | 90.0%          | 0.87        |
| Marsh          | 1     | 54    | 0          | 5           | 60             | 0.10            |                |             |
| Wet meadow     | 0     | 3     | 54         | 3           | 60             | 0.10            |                |             |
| Woody/Shrub    | 0     | 3     | 3          | 54          | 60             | 0.10            |                |             |
| Marginal total | 55    | 63    | 60         | 62          | 240            |                 |                |             |
| Omission Error | 0.02  | 0.14  | 0.10       | 0.13        |                |                 |                |             |

231

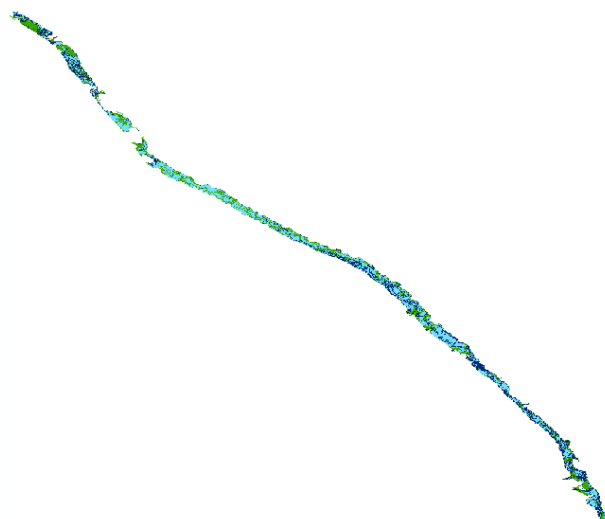

232

233

234

235

**Table S49.** Confusion Matrix with commission and omission errors from late-May to July 1998

| Classes        | Water | Marsh | Wet meadow | Woody/Shrub | Marginal total | Comission Error | Total Accuracy | Kappa Index |
|----------------|-------|-------|------------|-------------|----------------|-----------------|----------------|-------------|
| Water          | 55    | 3     | 2          | 0           | 60             | 0.08            | 87.5%          | 0.83        |
| Marsh          | 1     | 55    | 0          | 4           | 60             | 0.08            |                |             |
| Wet meadow     | 2     | 4     | 50         | 4           | 60             | 0.17            |                |             |
| Woody/Shrub    | 1     | 4     | 5          | 50          | 60             | 0.17            |                |             |
| Marginal total | 59    | 66    | 57         | 58          | 240            |                 |                |             |
| Omission Error | 0.07  | 0.17  | 0.12       | 0.14        |                |                 |                |             |

236

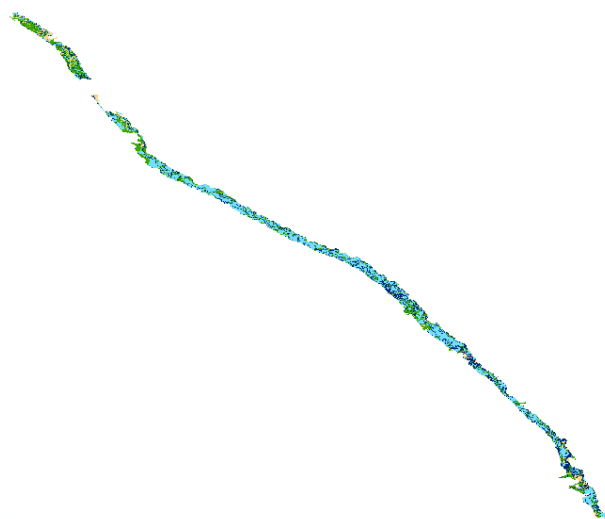

237

238

239

**Table S50.** Confusion Matrix with commission and omission errors from late-May to July 2001

| Classes        | Water | Marsh | Wet meadow | Woody/Shrub | Marginal total | Comission Error | Total Accuracy | Kappa Index |
|----------------|-------|-------|------------|-------------|----------------|-----------------|----------------|-------------|
| Water          | 52    | 4     | 4          | 0           | 60             | 0.13            | 86.7%          | 0.82        |
| Marsh          | 1     | 51    | 3          | 5           | 60             | 0.15            |                |             |
| Wet meadow     | 0     | 3     | 53         | 4           | 60             | 0.12            |                |             |
| Woody/Shrub    | 0     | 3     | 5          | 52          | 60             | 0.13            |                |             |
| Marginal total | 53    | 61    | 65         | 61          | 240            |                 |                |             |
| Omission Error | 0.02  | 0.16  | 0.18       | 0.15        |                |                 |                |             |

240

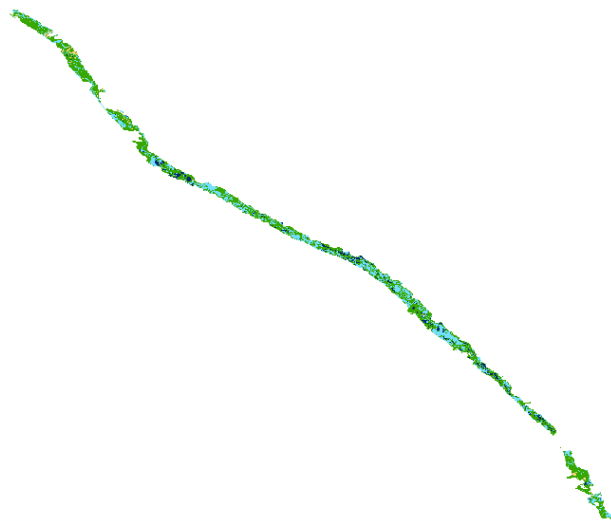

241

242

243

**Table S51.** Confusion Matrix with commission and omission errors from late-May to July 2002

| Classes        | Water | Marsh | Wet meadow | Woody/Shrub | Marginal total | Comission Error | Total Accuracy | Kappa Index |
|----------------|-------|-------|------------|-------------|----------------|-----------------|----------------|-------------|
| Water          | 56    | 3     | 1          | 0           | 60             | 0.07            | 89.6%          | 0.86        |
| Marsh          | 1     | 55    | 0          | 4           | 60             | 0.08            |                |             |
| Wet meadow     | 0     | 3     | 54         | 3           | 60             | 0.10            |                |             |
| Woody/Shrub    | 0     | 4     | 6          | 50          | 60             | 0.17            |                |             |
| Marginal total | 57    | 65    | 61         | 57          | 240            |                 |                |             |
| Omission Error | 0.02  | 0.15  | 0.11       | 0.12        |                |                 |                |             |

244

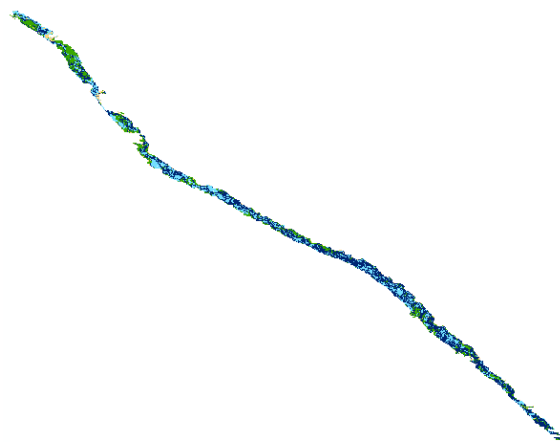

245

246

247

248

**Table S52.** Confusion Matrix with commission and omission errors from late-May to July 2004

| Classes        | Water | Marsh | Wet meadow | Woody/Shrub | Marginal total | Comission Error | Total Accuracy | Kappa Index |
|----------------|-------|-------|------------|-------------|----------------|-----------------|----------------|-------------|
| Water          | 57    | 1     | 2          | 0           | 60             | 0.05            | 91.3%          | 0.88        |
| Marsh          | 1     | 55    | 0          | 4           | 60             | 0.08            |                |             |
| Wet meadow     | 0     | 3     | 54         | 3           | 60             | 0.10            |                |             |
| Woody/Shrub    | 0     | 3     | 4          | 53          | 60             | 0.12            |                |             |
| Marginal total | 58    | 62    | 60         | 60          | 240            |                 |                |             |
| Omission Error | 0.02  | 0.11  | 0.10       | 0.12        |                |                 |                |             |

249

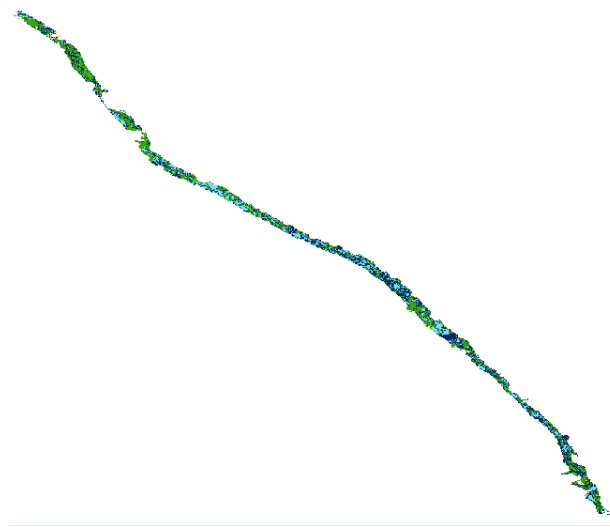

250

251

252

**Table S53.** Confusion Matrix with commission and omission errors from late-May to July 2005

| Classes        | Water | Marsh | Wet meadow | Woody/Shrub | Marginal total | Comission Error | Total Accuracy | Kappa Index |
|----------------|-------|-------|------------|-------------|----------------|-----------------|----------------|-------------|
| Water          | 89    | 2     | 9          | 0           | 100            | 0.11            | 87.0%          | 0.83        |
| Marsh          | 6     | 84    | 10         | 0           | 100            | 0.16            |                |             |
| Wet meadow     | 3     | 7     | 85         | 5           | 100            | 0.15            |                |             |
| Woody/Shrub    | 0     | 6     | 4          | 90          | 100            | 0.10            |                |             |
| Marginal total | 98    | 99    | 108        | 95          | 400            |                 |                |             |
| Omission Error | 0.09  | 0.15  | 0.21       | 0.05        |                |                 |                |             |

253

254

255

256

**Table S54.** Confusion Matrix with commission and omission errors from late-May to July 2006

| Classes        | Water | Marsh | Wet meadow | Woody/Shrub | Marginal total | Comission Error | Total Accuracy | Kappa Index |
|----------------|-------|-------|------------|-------------|----------------|-----------------|----------------|-------------|
| Water          | 58    | 1     | 1          | 0           | 60             | 0.03            | 91.7%          | 0.89        |
| Marsh          | 1     | 55    | 0          | 4           | 60             | 0.08            |                |             |
| Wet meadow     | 0     | 2     | 54         | 4           | 60             | 0.10            |                |             |
| Woody/Shrub    | 0     | 4     | 3          | 53          | 60             | 0.12            |                |             |
| Marginal total | 59    | 62    | 58         | 61          | 240            |                 |                |             |
| Omission Error | 0.02  | 0.11  | 0.07       | 0.13        |                |                 |                |             |

257

258

259

260

261

**Table S55.** Confusion Matrix with commission and omission errors from late-May to July 2009

| Classes        | Water | Marsh | Wet meadow | Woody/Shrub | Marginal total | Comission Error | Total Accuracy | Kappa Index |
|----------------|-------|-------|------------|-------------|----------------|-----------------|----------------|-------------|
| Water          | 91    | 4     | 5          | 0           | 100            | 0.09            |                |             |
| Marsh          | 5     | 86    | 5          | 4           | 100            | 0.14            |                |             |
| Wet meadow     | 3     | 5     | 86         | 6           | 100            | 0.14            | 87.8%          | 0.84        |
| Woody/Shrub    | 0     | 1     | 11         | 88          | 100            | 0.12            |                |             |
| Marginal total | 99    | 96    | 107        | 98          | 400            |                 |                |             |
| Omission Error | 0.08  | 0.10  | 0.20       | 0.10        |                |                 |                |             |

262

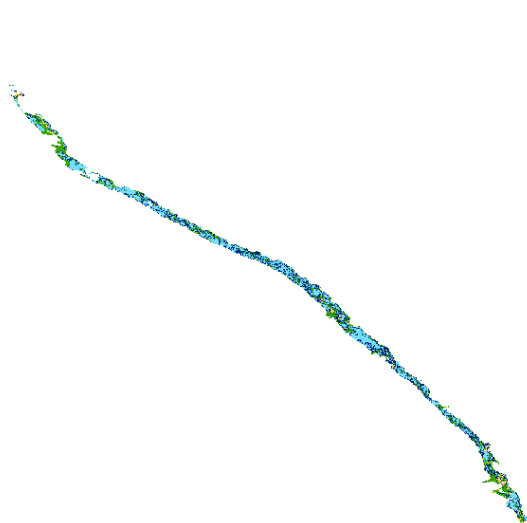

263

264

265

**Table S56.** Confusion Matrix with commission and omission errors from late-May to July 2010

| Classes        | Water | Marsh | Wet meadow | Woody/Shrub | Marginal total | Comission Error | Total Accuracy | Kappa Index |
|----------------|-------|-------|------------|-------------|----------------|-----------------|----------------|-------------|
| Water          | 54    | 2     | 4          | 0           | 60             | 0.10            |                |             |
| Marsh          | 1     | 55    | 0          | 4           | 60             | 0.08            |                |             |
| Wet meadow     | 0     | 3     | 53         | 4           | 60             | 0.12            | 89.6%          | 0.86        |
| Woody/Shrub    | 0     | 4     | 3          | 53          | 60             | 0.12            |                |             |
| Marginal total | 55    | 64    | 60         | 61          | 240            |                 |                |             |
| Omission Error | 0.02  | 0.14  | 0.12       | 0.13        |                |                 |                |             |

266

267

268

269

**Table S57.** Confusion Matrix with commission and omission errors from late-May to July 2013

| Classes        | Water | Marsh | Wet meadow | Woody/Shrub | Marginal total | Comission Error | Total Accuracy | Kappa Index |
|----------------|-------|-------|------------|-------------|----------------|-----------------|----------------|-------------|
| Water          | 54    | 5     | 1          | 0           | 60             | 0.10            | 90.8%          | 0.88        |
| Marsh          | 1     | 54    | 0          | 5           | 60             | 0.10            |                |             |
| Wet meadow     | 0     | 3     | 55         | 2           | 60             | 0.08            |                |             |
| Woody/Shrub    | 0     | 2     | 3          | 55          | 60             | 0.08            |                |             |
| Marginal total | 55    | 64    | 59         | 62          | 240            |                 |                |             |
| Omission Error | 0.02  | 0.16  | 0.07       | 0.11        |                |                 |                |             |

270

271

272

273



274

**Table S58.** Confusion Matrix with commission and omission errors from late-May to July 2014

| Classes        | Water | Marsh | Wet meadow | Woody/Shrub | Marginal total | Comission Error | Total Accuracy | Kappa Index |
|----------------|-------|-------|------------|-------------|----------------|-----------------|----------------|-------------|
| Water          | 56    | 1     | 3          | 0           | 60             | 0.07            | 89.6%          | 0.86        |
| Marsh          | 1     | 53    | 3          | 3           | 60             | 0.12            |                |             |
| Wet meadow     | 0     | 4     | 53         | 3           | 60             | 0.12            |                |             |
| Woody/Shrub    | 0     | 3     | 4          | 53          | 60             | 0.12            |                |             |
| Marginal total | 57    | 61    | 63         | 59          | 240            |                 |                |             |
| Omission Error | 0.02  | 0.13  | 0.16       | 0.10        |                |                 |                |             |

275

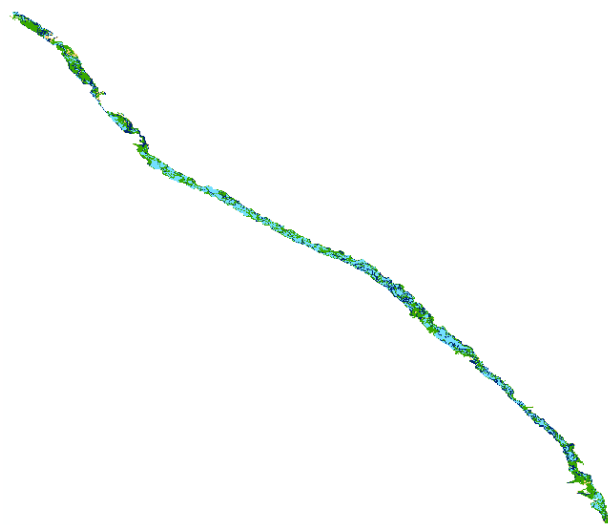

276

277

278

**Table S59.** Confusion Matrix with commission and omission errors from late-May to July 2015

| Classes        | Water | Marsh | Wet meadow | Woody/Shrub | Marginal total | Comission Error | Total Accuracy | Kappa Index |
|----------------|-------|-------|------------|-------------|----------------|-----------------|----------------|-------------|
| Water          | 55    | 1     | 4          | 0           | 60             | 0.08            | 90.4%          | 0.87        |
| Marsh          | 1     | 55    | 0          | 4           | 60             | 0.08            |                |             |
| Wet meadow     | 0     | 4     | 53         | 3           | 60             | 0.12            |                |             |
| Woody/Shrub    | 0     | 5     | 1          | 54          | 60             | 0.10            |                |             |
| Marginal total | 56    | 65    | 58         | 61          | 240            |                 |                |             |
| Omission Error | 0.02  | 0.15  | 0.09       | 0.11        |                |                 |                |             |

279

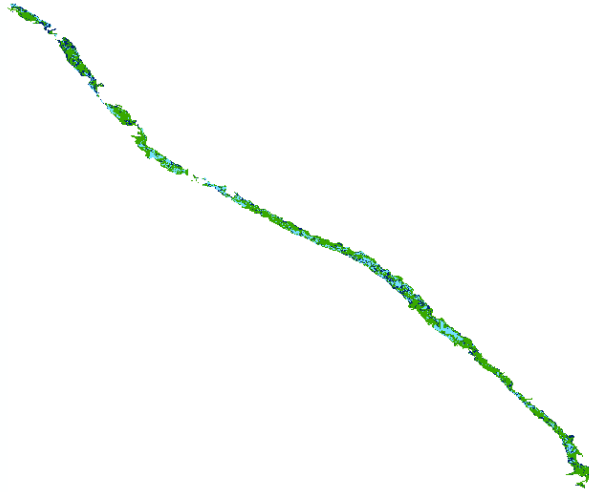

280

281

282

**Table S60.** Confusion Matrix with commission and omission errors from late-May to July 2016

| Classes        | Water | Marsh | Wet meadow | Woody/Shrub | Marginal total | Comission Error | Total Accuracy | Kappa Index |
|----------------|-------|-------|------------|-------------|----------------|-----------------|----------------|-------------|
| Water          | 90    | 5     | 5          | 0           | 100            | 0.10            | 89.0%          | 0.85        |
| Marsh          | 5     | 88    | 7          | 0           | 100            | 0.12            |                |             |
| Wet meadow     | 5     | 4     | 87         | 4           | 100            | 0.13            |                |             |
| Woody/Shrub    | 0     | 5     | 4          | 91          | 100            | 0.09            |                |             |
| Marginal total | 100   | 102   | 103        | 95          | 400            |                 |                |             |
| Omission Error | 0.10  | 0.14  | 0.16       | 0.04        |                |                 |                |             |

283

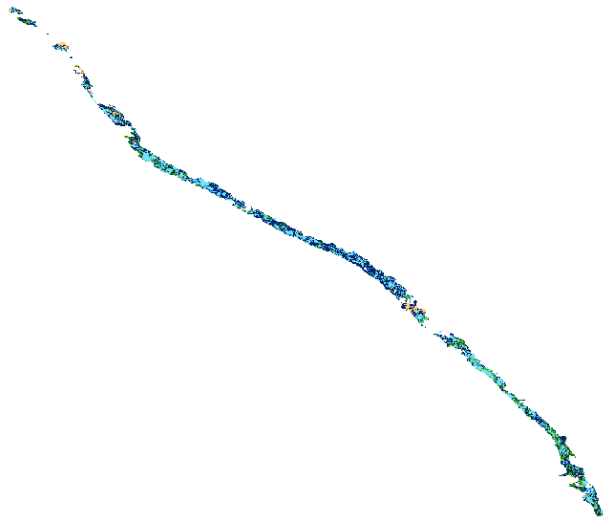

284

285

286

287

**Table S61.** Confusion Matrix with commission and omission errors from late-May to July 2017

| Classes        | Water | Marsh | Wet meadow | Woody/Shrub | Marginal total | Comission Error | Total Accuracy | Kappa Index |
|----------------|-------|-------|------------|-------------|----------------|-----------------|----------------|-------------|
| Water          | 92    | 4     | 4          | 0           | 100            | 0.08            |                |             |
| Marsh          | 5     | 86    | 9          | 0           | 100            | 0.14            |                |             |
| Wet meadow     | 5     | 5     | 88         | 2           | 100            | 0.12            | 88.8%          | 0.85        |
| Woody/Shrub    | 0     | 5     | 6          | 89          | 100            | 0.11            |                |             |
| Marginal total | 102   | 100   | 107        | 91          | 400            |                 |                |             |
| Omission Error | 0.10  | 0.14  | 0.18       | 0.02        |                |                 |                |             |

288

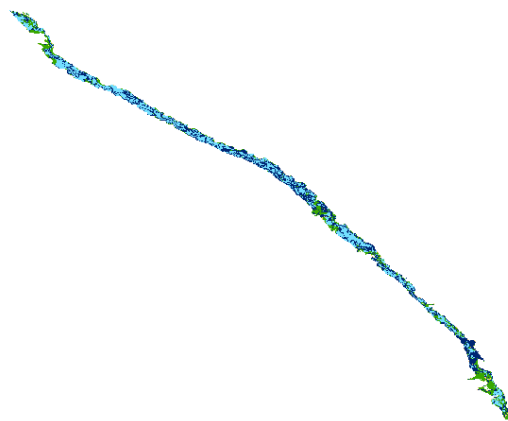

289

290

291

**Table S62.** Confusion Matrix with commission and omission errors from late-May to July 2018

| Classes        | Water | Marsh | Wet meadow | Woody/Shrub | Marginal total | Comission Error | Total Accuracy | Kappa Index |
|----------------|-------|-------|------------|-------------|----------------|-----------------|----------------|-------------|
| Water          | 93    | 3     | 4          | 0           | 100            | 0.07            |                |             |
| Marsh          | 4     | 88    | 8          | 0           | 100            | 0.12            |                |             |
| Wet meadow     | 4     | 4     | 89         | 3           | 100            | 0.11            | 90.0%          | 0.87        |
| Woody/Shrub    | 0     | 4     | 6          | 90          | 100            | 0.10            |                |             |
| Marginal total | 101   | 99    | 107        | 93          | 400            |                 |                |             |
| Omission Error | 0.08  | 0.11  | 0.17       | 0.03        |                |                 |                |             |

292

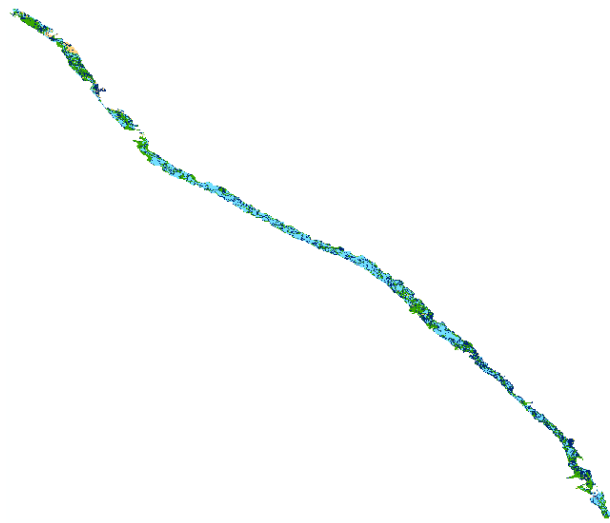

293

294

295

**Table S63.** Confusion Matrix with commission and omission errors from late-May to July 2019

| Classes        | Water | Marsh | Wet meadow | Woody/Shrub | Marginal total | Comission Error | Total Accuracy | Kappa Index |
|----------------|-------|-------|------------|-------------|----------------|-----------------|----------------|-------------|
| Water          | 91    | 4     | 5          | 0           | 100            | 0.09            | 90.0%          | 0.87        |
| Marsh          | 2     | 88    | 10         | 0           | 100            | 0.12            |                |             |
| Wet meadow     | 4     | 4     | 89         | 3           | 100            | 0.11            |                |             |
| Woody/Shrub    | 0     | 3     | 5          | 92          | 100            | 0.08            |                |             |
| Marginal total | 97    | 99    | 109        | 95          | 400            |                 |                |             |
| Omission Error | 0.06  | 0.11  | 0.18       | 0.03        |                |                 |                |             |

296

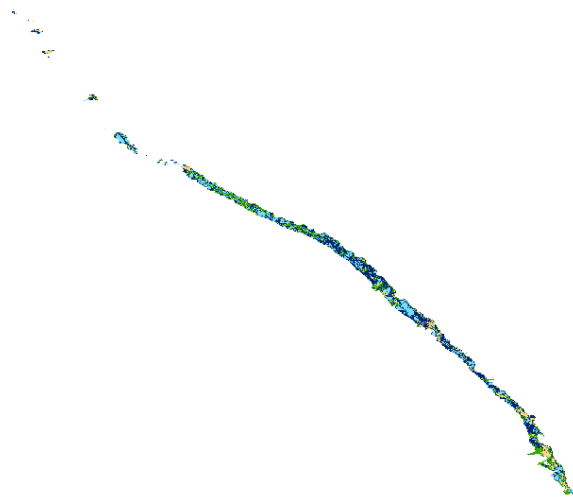

297

298

299

300

**Table S64.** Confusion Matrix with commission and omission errors from late-May to July 2020

| Classes        | Water | Marsh | Wet meadow | Woody/Shrub | Marginal total | Comission Error | Total Accuracy | Kappa Index |
|----------------|-------|-------|------------|-------------|----------------|-----------------|----------------|-------------|
| Water          | 90    | 1     | 9          | 0           | 100            | 0.10            | 87.0%          | 0.83        |
| Marsh          | 8     | 85    | 7          | 0           | 100            | 0.15            |                |             |
| Wet meadow     | 5     | 5     | 86         | 4           | 100            | 0.14            |                |             |
| Woody/Shrub    | 0     | 4     | 9          | 87          | 100            | 0.13            |                |             |
| Marginal total | 103   | 95    | 111        | 91          | 400            |                 |                |             |
| Omission Error | 0.13  | 0.11  | 0.23       | 0.04        |                |                 |                |             |

301

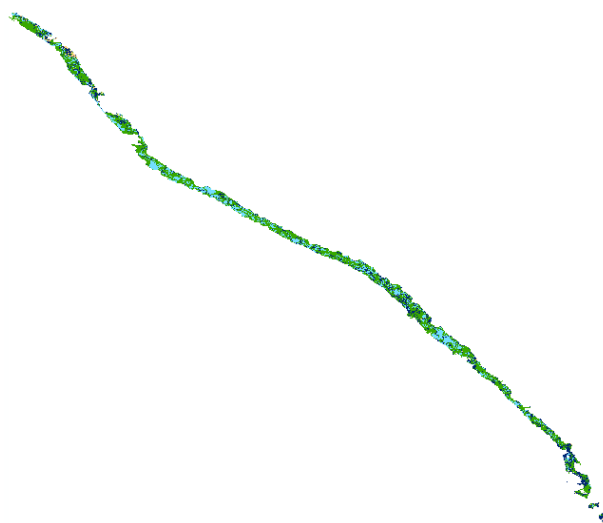

302

303

304

**Table S65.** Confusion Matrix with commission and omission errors from late-May to July 2021

| Classes        | Water | Marsh | Wet meadow | Woody/Shrub | Marginal total | Comission Error | Total Accuracy | Kappa Index |
|----------------|-------|-------|------------|-------------|----------------|-----------------|----------------|-------------|
| Water          | 92    | 4     | 4          | 0           | 100            | 0.08            | 88.8%          | 0.85        |
| Marsh          | 8     | 86    | 6          | 0           | 100            | 0.14            |                |             |
| Wet meadow     | 1     | 6     | 89         | 4           | 100            | 0.11            |                |             |
| Woody/Shrub    | 0     | 5     | 7          | 88          | 100            | 0.12            |                |             |
| Marginal total | 101   | 101   | 106        | 92          | 400            |                 |                |             |
| Omission Error | 0.09  | 0.15  | 0.16       | 0.04        |                |                 |                |             |

305

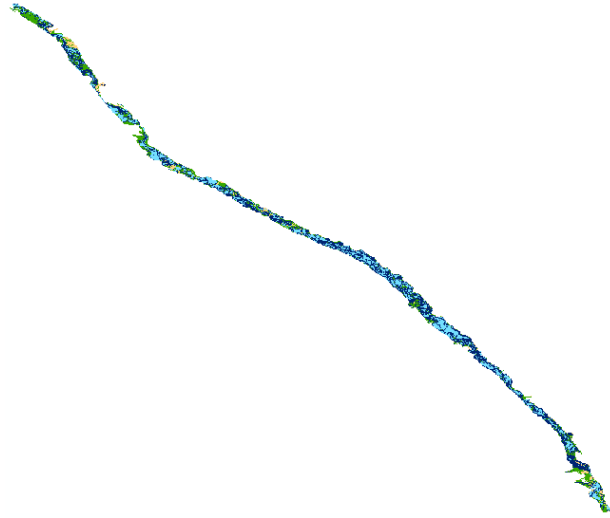

306

307

308

**Table S66.** Confusion Matrix with commission and omission errors from late-May to July 2022

| Classes        | Water | Marsh | Wet meadow | Woody/Shrub | Marginal total | Comission Error | Total Accuracy | Kappa Index |
|----------------|-------|-------|------------|-------------|----------------|-----------------|----------------|-------------|
| Water          | 91    | 3     | 6          | 0           | 100            | 0.09            | 90.3%          | 0.87        |
| Marsh          | 4     | 90    | 6          | 0           | 100            | 0.10            |                |             |
| Wet meadow     | 3     | 2     | 89         | 6           | 100            | 0.11            |                |             |
| Woody/Shrub    | 0     | 4     | 5          | 91          | 100            | 0.09            |                |             |
| Marginal total | 98    | 99    | 106        | 97          | 400            |                 |                |             |
| Omission Error | 0.07  | 0.09  | 0.16       | 0.06        |                |                 |                |             |

309

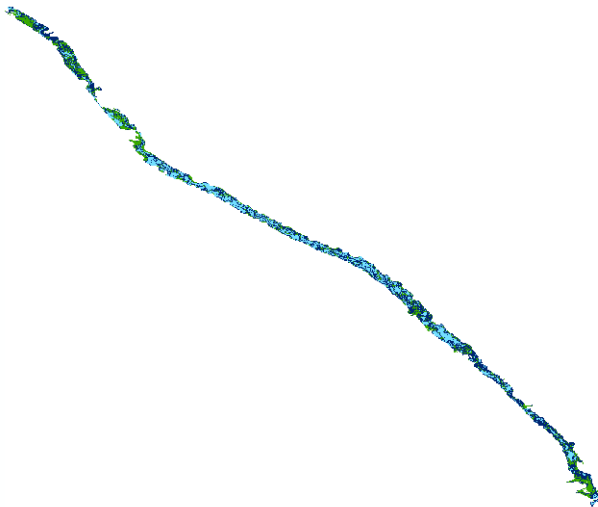

310

311

312

313 **2.3. Season: August to mid-September**

314

315 **Table S67.** Confusion Matrix with commission and omission errors from August to mid-September 1984

| Classes        | Water | Marsh | Wet meadow | Woody/Shrub | Marginal total | Comission Error | Total Accuracy | Kappa Index |
|----------------|-------|-------|------------|-------------|----------------|-----------------|----------------|-------------|
| Water          | 84    | 10    | 6          | 0           | 100            | 0.16            | 81.8%          | 0.76        |
| Marsh          | 0     | 82    | 12         | 6           | 100            | 0.18            |                |             |
| Wet meadow     | 0     | 12    | 80         | 8           | 100            | 0.20            |                |             |
| Woody/Shrub    | 0     | 7     | 12         | 81          | 100            | 0.19            |                |             |
| Marginal total | 84    | 111   | 110        | 95          | 400            |                 |                |             |
| Omission Error | 0     | 0.26  | 0.27       | 0.15        |                |                 |                |             |

316

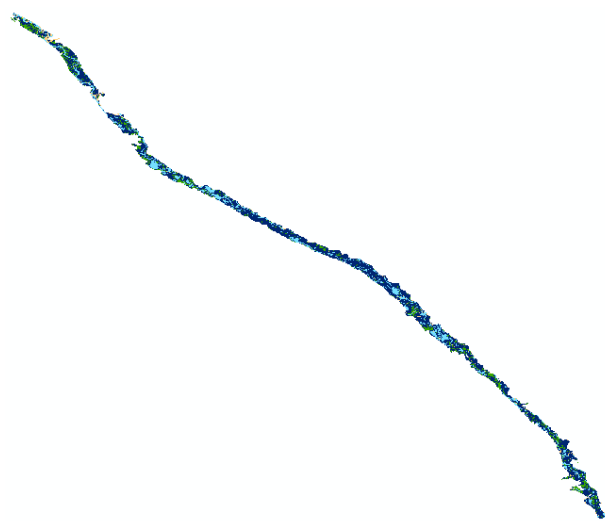

317

318

319 **Table S68.** Confusion Matrix with commission and omission errors from August to mid-September 1985

| Classes        | Water | Marsh | Wet meadow | Woody/Shrub | Marginal total | Comission Error | Total Accuracy | Kappa Index |
|----------------|-------|-------|------------|-------------|----------------|-----------------|----------------|-------------|
| Water          | 85    | 9     | 6          | 0           | 100            | 0.15            | 84.5%          | 0.79        |
| Marsh          | 0     | 84    | 10         | 6           | 100            | 0.16            |                |             |
| Wet meadow     | 0     | 11    | 85         | 4           | 100            | 0.15            |                |             |
| Woody/Shrub    | 0     | 6     | 10         | 84          | 100            | 0.16            |                |             |
| Marginal total | 85    | 110   | 111        | 94          | 400            |                 |                |             |
| Omission Error | 0     | 0.236 | 0.23       | 0.11        |                |                 |                |             |

320

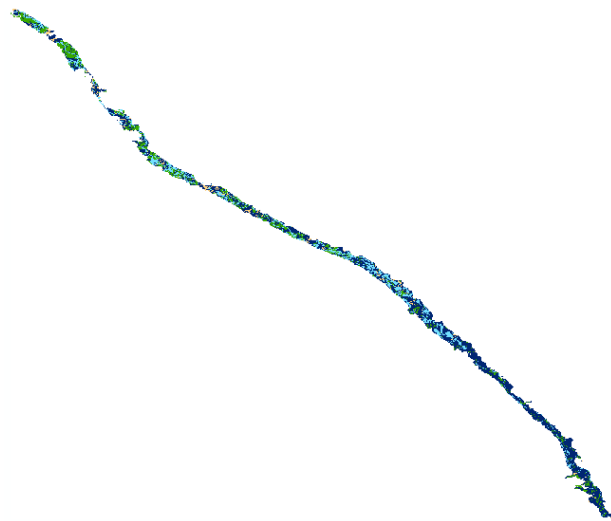

321

322

323

**Table S69.** Confusion Matrix with commission and omission errors from August to mid-September 1986

| Classes        | Water | Marsh | Wet meadow | Woody/Shrub | Marginal total | Comission Error | Total Accuracy | Kappa Index |
|----------------|-------|-------|------------|-------------|----------------|-----------------|----------------|-------------|
| Water          | 86    | 3     | 5          | 0           | 94             | 0.09            |                |             |
| Marsh          | 0     | 85    | 12         | 3           | 100            | 0.15            |                |             |
| Wet meadow     | 0     | 11    | 84         | 5           | 100            | 0.16            | 86.3%          | 0.82        |
| Woody/Shrub    | 0     | 4     | 11         | 85          | 100            | 0.15            |                |             |
| Marginal total | 86    | 103   | 112        | 93          | 394            |                 |                |             |
| Omission Error | 0     | 0.175 | 0.25       | 0.09        |                |                 |                |             |

324

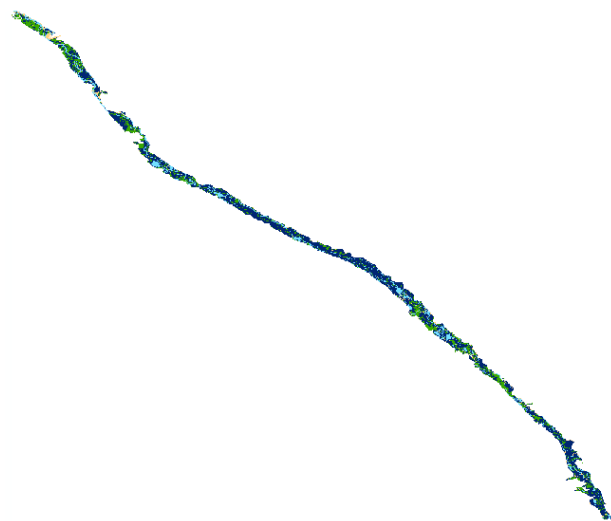

325

326

327



328

**Table S70.** Confusion Matrix with commission and omission errors from August to mid-September 1987

| Classes        | Water | Marsh | Wet meadow | Woody/Shrub | Marginal total | Comission Error | Total Accuracy | Kappa Index |
|----------------|-------|-------|------------|-------------|----------------|-----------------|----------------|-------------|
| Water          | 87    | 9     | 4          | 0           | 100            | 0.13            | 85.0%          | 0.80        |
| Marsh          | 6     | 84    | 10         | 0           | 100            | 0.16            |                |             |
| Wet meadow     | 0     | 12    | 83         | 5           | 100            | 0.17            |                |             |
| Woody/Shrub    | 0     | 8     | 6          | 86          | 100            | 0.14            |                |             |
| Marginal total | 93    | 113   | 103        | 91          | 400            |                 |                |             |
| Omission Error | 0.06  | 0.26  | 0.19       | 0.05        |                |                 |                |             |

329

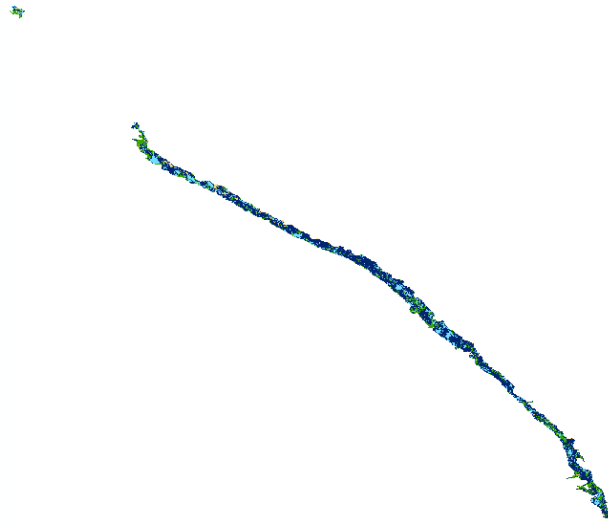

330

331

332

**Table S71.** Confusion Matrix with commission and omission errors from August to mid-September 1988

| Classes        | Water | Marsh | Wet meadow | Woody/Shrub | Marginal total | Comission Error | Total Accuracy | Kappa Index |
|----------------|-------|-------|------------|-------------|----------------|-----------------|----------------|-------------|
| Water          | 86    | 8     | 4          | 0           | 98             | 0.12            | 82.7%          | 0.77        |
| Marsh          | 0     | 80    | 15         | 5           | 100            | 0.20            |                |             |
| Wet meadow     | 0     | 6     | 83         | 11          | 100            | 0.17            |                |             |
| Woody/Shrub    | 0     | 12    | 8          | 80          | 100            | 0.20            |                |             |
| Marginal total | 86    | 106   | 110        | 96          | 398            |                 |                |             |
| Omission Error | 0     | 0.25  | 0.25       | 0.17        |                |                 |                |             |

333

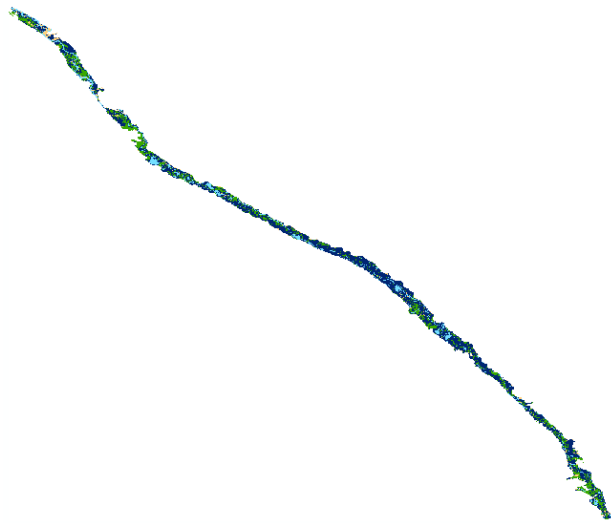

334

335

336 **Table S72.** Confusion Matrix with commission and omission errors from August to mid-September 1990

| Classes        | Water | Marsh | Wet meadow | Woody/Shrub | Marginal total | Comission Error | Total Accuracy | Kappa Index |
|----------------|-------|-------|------------|-------------|----------------|-----------------|----------------|-------------|
| Water          | 80    | 12    | 8          | 0           | 100            | 0.20            |                |             |
| Marsh          | 6     | 79    | 5          | 10          | 100            | 0.21            |                |             |
| Wet meadow     | 4     | 11    | 77         | 8           | 100            | 0.23            | 79.3%          | 0.72        |
| Woody/Shrub    | 0     | 10    | 9          | 81          | 100            | 0.19            |                |             |
| Marginal total | 90    | 112   | 99         | 99          | 400            |                 |                |             |
| Omission Error | 0.11  | 0.29  | 0.22       | 0.18        |                |                 |                |             |

337

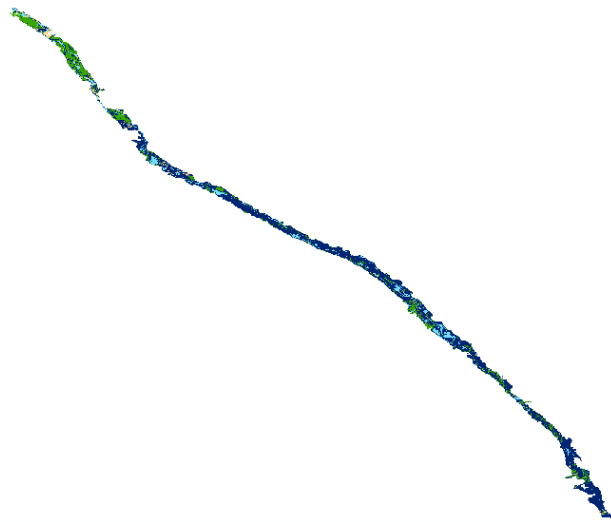

338

339

340

341 **Table S73.** Confusion Matrix with commission and omission errors from August to mid-September 1991

| Classes        | Water | Marsh | Wet meadow | Woody/Shrub | Marginal total | Comission Error | Total Accuracy | Kappa Index |
|----------------|-------|-------|------------|-------------|----------------|-----------------|----------------|-------------|
| Water          | 83    | 8     | 9          | 0           | 100            | 0.17            | 83.5%          | 0.78        |
| Marsh          | 6     | 82    | 6          | 6           | 100            | 0.18            |                |             |
| Wet meadow     | 4     | 9     | 84         | 3           | 100            | 0.16            |                |             |
| Woody/Shrub    | 0     | 9     | 6          | 85          | 100            | 0.15            |                |             |
| Marginal total | 93    | 108   | 105        | 94          | 400            |                 |                |             |
| Omission Error | 0.11  | 0.24  | 0.20       | 0.10        |                |                 |                |             |

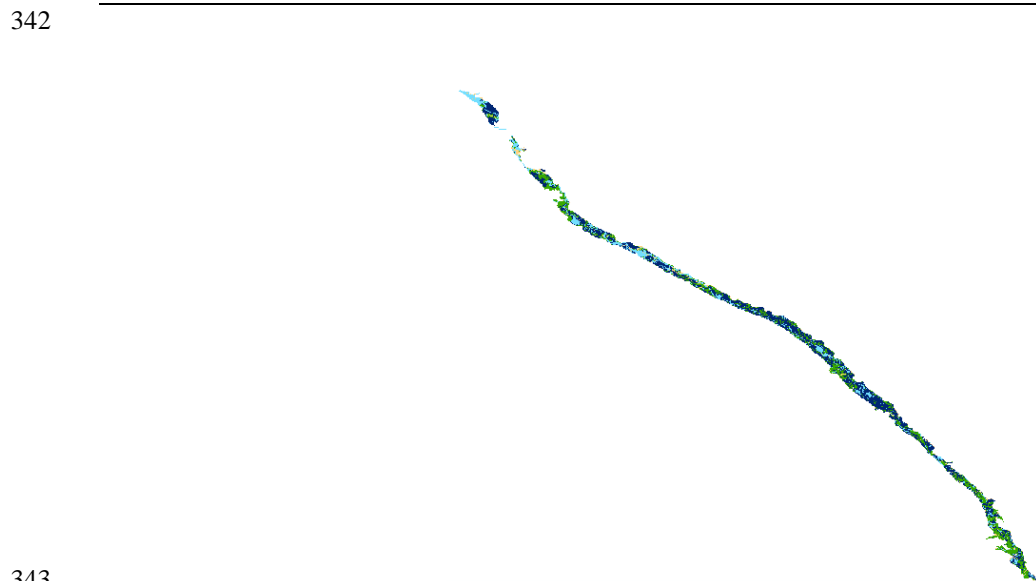

343  
344  
345 **Table S74.** Confusion Matrix with commission and omission errors from August to mid-September 1993

| Classes        | Water | Marsh | Wet meadow | Woody/Shrub | Marginal total | Comission Error | Total Accuracy | Kappa Index |
|----------------|-------|-------|------------|-------------|----------------|-----------------|----------------|-------------|
| Water          | 54    | 2     | 4          | 0           | 60             | 0.10            | 90.4%          | 0.87        |
| Marsh          | 1     | 54    | 0          | 5           | 60             | 0.10            |                |             |
| Wet meadow     | 0     | 4     | 55         | 1           | 60             | 0.08            |                |             |
| Woody/Shrub    | 0     | 1     | 5          | 54          | 60             | 0.10            |                |             |
| Marginal total | 55    | 61    | 64         | 60          | 240            |                 |                |             |
| Omission Error | 0.02  | 0.11  | 0.14       | 0.10        |                |                 |                |             |

346

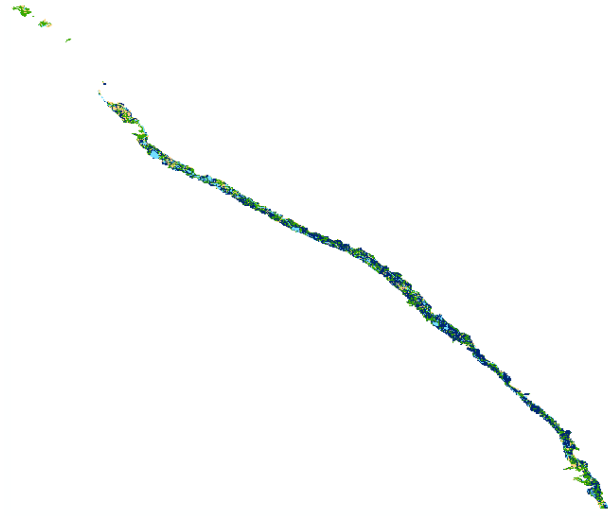

347

348

349 **Table S75.** Confusion Matrix with commission and omission errors from August to mid-September 1994

| Classes        | Water | Marsh | Wet meadow | Woody/Shrub | Marginal total | Comission Error | Total Accuracy | Kappa Index |
|----------------|-------|-------|------------|-------------|----------------|-----------------|----------------|-------------|
| Water          | 56    | 1     | 3          | 0           | 60             | 0.07            | 90.0%          | 0.87        |
| Marsh          | 1     | 54    | 0          | 5           | 60             | 0.10            |                |             |
| Wet meadow     | 0     | 3     | 53         | 4           | 60             | 0.12            |                |             |
| Woody/Shrub    | 0     | 4     | 3          | 53          | 60             | 0.12            |                |             |
| Marginal total | 57    | 62    | 59         | 62          | 240            |                 |                |             |
| Omission Error | 0.02  | 0.13  | 0.10       | 0.15        |                |                 |                |             |

350

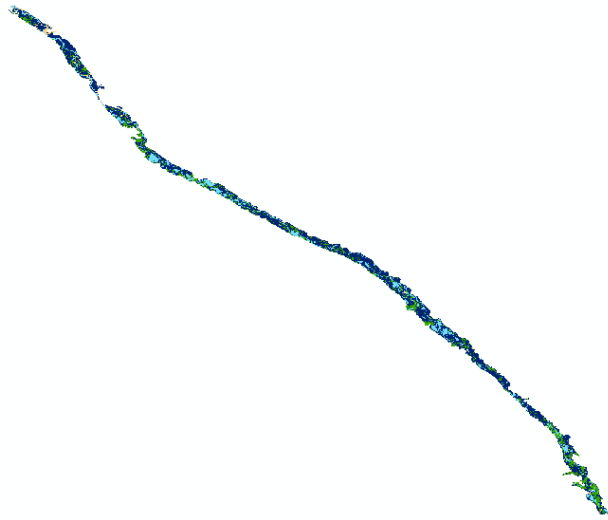

351

352

353

354

**Table S76.** Confusion Matrix with commission and omission errors from August to mid-September 1996

| Classes        | Water | Marsh | Wet meadow | Woody/Shrub | Marginal total | Comission Error | Total Accuracy | Kappa Index |
|----------------|-------|-------|------------|-------------|----------------|-----------------|----------------|-------------|
| Water          | 50    | 5     | 5          | 0           | 60             | 0.17            | 86.3%          | 0.82        |
| Marsh          | 1     | 53    | 0          | 6           | 60             | 0.12            |                |             |
| Wet meadow     | 0     | 4     | 53         | 3           | 60             | 0.12            |                |             |
| Woody/Shrub    | 0     | 4     | 5          | 51          | 60             | 0.15            |                |             |
| Marginal total | 51    | 66    | 63         | 60          | 240            |                 |                |             |
| Omission Error | 0.02  | 0.20  | 0.16       | 0.15        |                |                 |                |             |

355

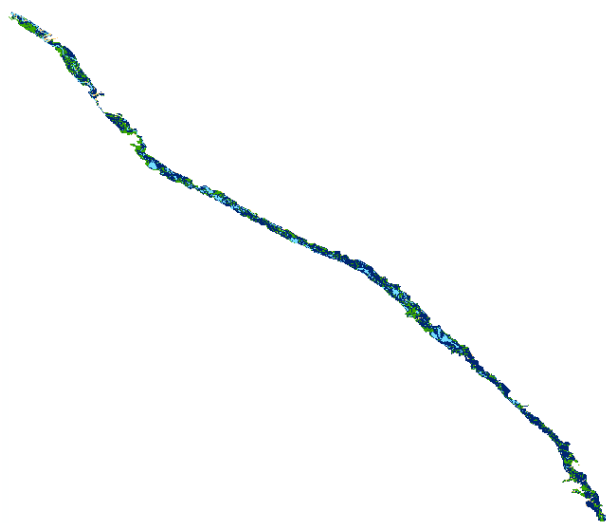

356

357

358

**Table S77.** Confusion Matrix with commission and omission errors from August to mid-September 1997

| Classes        | Water | Marsh | Wet meadow | Woody/Shrub | Marginal total | Comission Error | Total Accuracy | Kappa Index |
|----------------|-------|-------|------------|-------------|----------------|-----------------|----------------|-------------|
| Water          | 56    | 1     | 3          | 0           | 60             | 0.07            | 90.4%          | 0.87        |
| Marsh          | 1     | 55    | 0          | 4           | 60             | 0.08            |                |             |
| Wet meadow     | 0     | 3     | 53         | 4           | 60             | 0.12            |                |             |
| Woody/Shrub    | 0     | 4     | 3          | 53          | 60             | 0.12            |                |             |
| Marginal total | 57    | 63    | 59         | 61          | 240            |                 |                |             |
| Omission Error | 0.02  | 0.13  | 0.10       | 0.13        |                |                 |                |             |

359

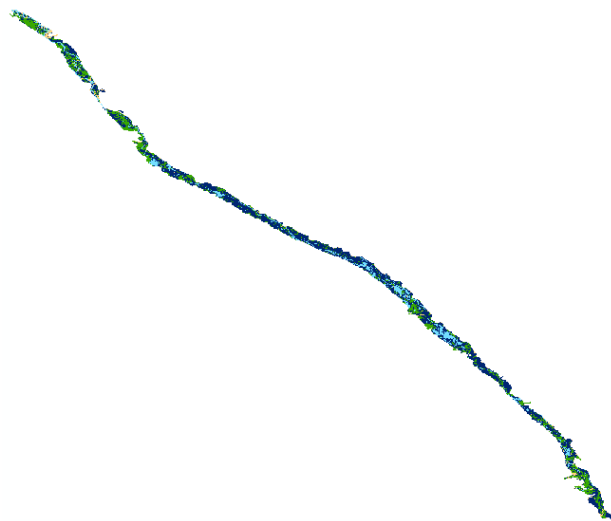

360

361

362 **Table S78.** Confusion Matrix with commission and omission errors from August to mid-September 1998

| Classes        | Water | Marsh | Wet meadow | Woody/Shrub | Marginal total | Comission Error | Total Accuracy | Kappa Index |
|----------------|-------|-------|------------|-------------|----------------|-----------------|----------------|-------------|
| Water          | 53    | 2     | 5          | 0           | 60             | 0.12            | 88.8%          | 0.85        |
| Marsh          | 1     | 54    | 0          | 5           | 60             | 0.10            |                |             |
| Wet meadow     | 0     | 4     | 55         | 1           | 60             | 0.08            |                |             |
| Woody/Shrub    | 0     | 4     | 5          | 51          | 60             | 0.15            |                |             |
| Marginal total | 54    | 64    | 65         | 57          | 240            |                 |                |             |
| Omission Error | 0.02  | 0.16  | 0.15       | 0.11        |                |                 |                |             |

363

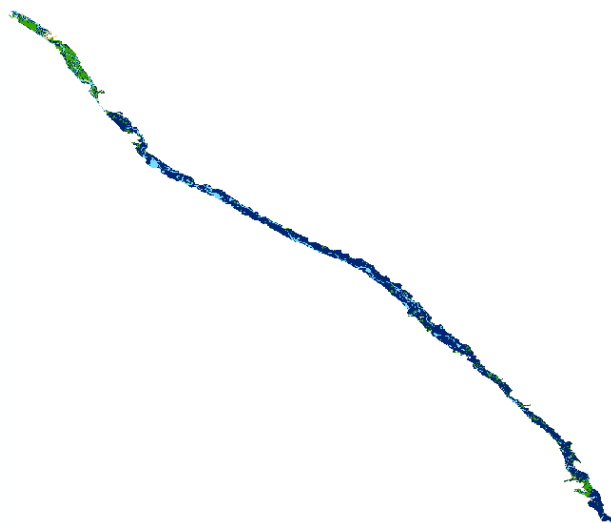

364

365

366

367

**Table S79.** Confusion Matrix with commission and omission errors from August to mid-September 2000

| Classes        | Water | Marsh | Wet meadow | Woody/Shrub | Marginal total | Comission Error | Total Accuracy | Kappa Index |
|----------------|-------|-------|------------|-------------|----------------|-----------------|----------------|-------------|
| Water          | 53    | 3     | 4          | 0           | 60             | 0.12            | 87.9%          | 0.84        |
| Marsh          | 1     | 56    | 0          | 3           | 60             | 0.07            |                |             |
| Wet meadow     | 0     | 4     | 52         | 4           | 60             | 0.13            |                |             |
| Woody/Shrub    | 0     | 4     | 6          | 50          | 60             | 0.17            |                |             |
| Marginal total | 54    | 67    | 62         | 57          | 240            |                 |                |             |
| Omission Error | 0.02  | 0.16  | 0.16       | 0.12        |                |                 |                |             |

368

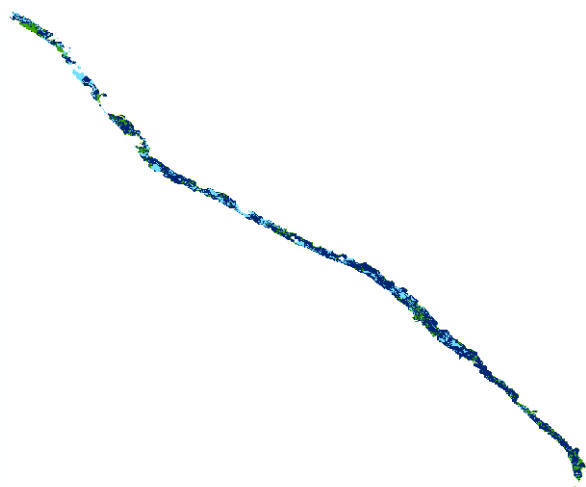

369

370

**Table S80.** Confusion Matrix with commission and omission errors from August to mid-September 2001

| Classes        | Water | Marsh | Wet meadow | Woody/Shrub | Marginal total | Comission Error | Total Accuracy | Kappa Index |
|----------------|-------|-------|------------|-------------|----------------|-----------------|----------------|-------------|
| Water          | 52    | 7     | 1          | 0           | 60             | 0.13            | 86.3%          | 0.82        |
| Marsh          | 1     | 55    | 1          | 3           | 60             | 0.08            |                |             |
| Wet meadow     | 0     | 4     | 50         | 6           | 60             | 0.17            |                |             |
| Woody/Shrub    | 1     | 4     | 5          | 50          | 60             | 0.17            |                |             |
| Marginal total | 54    | 70    | 57         | 59          | 240            |                 |                |             |
| Omission Error | 0.04  | 0.21  | 0.12       | 0.15        |                |                 |                |             |

372

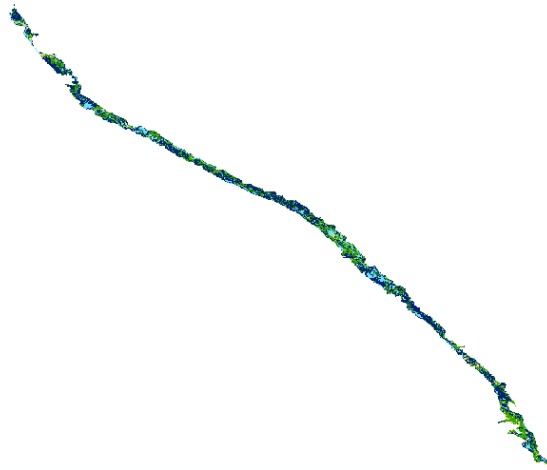

373

374

375 **Table S81.** Confusion Matrix with commission and omission errors from August to mid-September 2002

| Classes        | Water | Marsh | Wet meadow | Woody/Shrub | Marginal total | Comission Error | Total Accuracy | Kappa Index |
|----------------|-------|-------|------------|-------------|----------------|-----------------|----------------|-------------|
| Water          | 53    | 3     | 4          | 0           | 60             | 0.12            |                |             |
| Marsh          | 1     | 53    | 1          | 5           | 60             | 0.12            |                |             |
| Wet meadow     | 0     | 4     | 55         | 1           | 60             | 0.08            | 90.0%          | 0.87        |
| Woody/Shrub    | 0     | 4     | 1          | 55          | 60             | 0.08            |                |             |
| Marginal total | 54    | 64    | 61         | 61          | 240            |                 |                |             |
| Omission Error | 0.02  | 0.17  | 0.10       | 0.10        |                |                 |                |             |

376

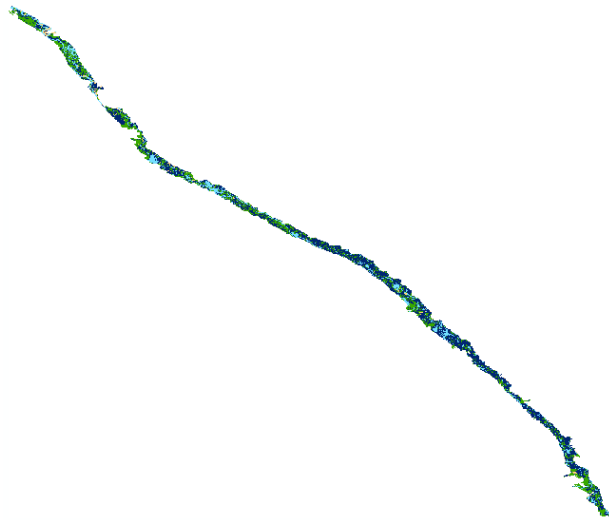

377

378

379



380

**Table S82.** Confusion Matrix with commission and omission errors from August to mid-September 2003

| Classes        | Water | Marsh | Wet meadow | Woody/Shrub | Marginal total | Comission Error | Total Accuracy | Kappa Index |
|----------------|-------|-------|------------|-------------|----------------|-----------------|----------------|-------------|
| Water          | 57    | 1     | 2          | 0           | 60             | 0.05            | 88.3%          | 0.84        |
| Marsh          | 0     | 54    | 0          | 6           | 60             | 0.10            |                |             |
| Wet meadow     | 0     | 5     | 50         | 5           | 60             | 0.17            |                |             |
| Woody/Shrub    | 0     | 4     | 5          | 51          | 60             | 0.15            |                |             |
| Marginal total | 57    | 64    | 57         | 62          | 240            |                 |                |             |
| Omission Error | 0.00  | 0.16  | 0.12       | 0.18        |                |                 |                |             |

381

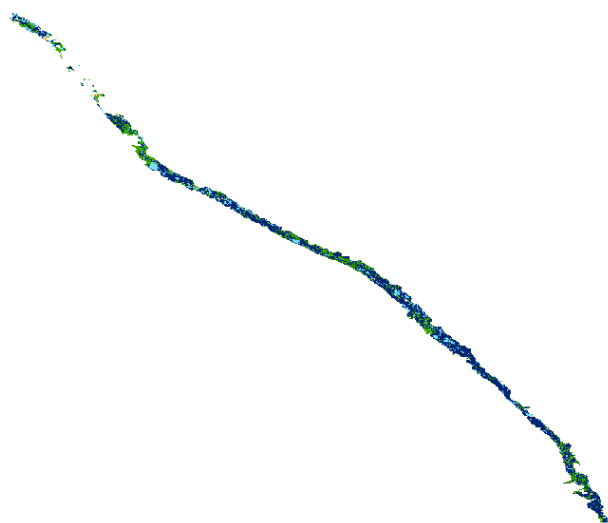

382

383

384

**Table S83.** Confusion Matrix with commission and omission errors from August to mid-September 2004

| Classes        | Water | Marsh | Wet meadow | Woody/Shrub | Marginal total | Comission Error | Total Accuracy | Kappa Index |
|----------------|-------|-------|------------|-------------|----------------|-----------------|----------------|-------------|
| Water          | 54    | 5     | 1          | 0           | 60             | 0.10            | 88.8%          | 0.85        |
| Marsh          | 1     | 53    | 0          | 6           | 60             | 0.12            |                |             |
| Wet meadow     | 0     | 4     | 52         | 4           | 60             | 0.13            |                |             |
| Woody/Shrub    | 0     | 4     | 2          | 54          | 60             | 0.10            |                |             |
| Marginal total | 55    | 66    | 55         | 64          | 240            |                 |                |             |
| Omission Error | 0.02  | 0.20  | 0.05       | 0.16        |                |                 |                |             |

385

386

387

388

**Table S84.** Confusion Matrix with commission and omission errors from August to mid-September 2005

| Classes        | Water | Marsh | Wet meadow | Woody/Shrub | Marginal total | Comission Error | Total Accuracy | Kappa Index |
|----------------|-------|-------|------------|-------------|----------------|-----------------|----------------|-------------|
| Water          | 81    | 11    | 8          | 0           | 100            | 0.19            |                |             |
| Marsh          | 9     | 82    | 9          | 0           | 100            | 0.18            |                |             |
| Wet meadow     | 4     | 8     | 82         | 6           | 100            | 0.18            | 82.3%          | 0.76        |
| Woody/Shrub    | 0     | 10    | 6          | 84          | 100            | 0.16            |                |             |
| Marginal total | 94    | 111   | 105        | 90          | 400            |                 |                |             |
| Omission Error | 0.14  | 0.26  | 0.22       | 0.07        |                |                 |                |             |

389

390

391

392

393

**Table S85.** Confusion Matrix with commission and omission errors from August to mid-September 2006

| Classes        | Water | Marsh | Wet meadow | Woody/Shrub | Marginal total | Comission Error | Total Accuracy | Kappa Index |
|----------------|-------|-------|------------|-------------|----------------|-----------------|----------------|-------------|
| Water          | 54    | 4     | 2          | 0           | 60             | 0.10            | 90.4%          | 0.87        |
| Marsh          | 1     | 54    | 0          | 5           | 60             | 0.10            |                |             |
| Wet meadow     | 0     | 2     | 54         | 4           | 60             | 0.10            |                |             |
| Woody/Shrub    | 0     | 4     | 1          | 55          | 60             | 0.08            |                |             |
| Marginal total | 55    | 64    | 57         | 64          | 240            |                 |                |             |
| Omission Error | 0.02  | 0.16  | 0.05       | 0.14        |                |                 |                |             |

394

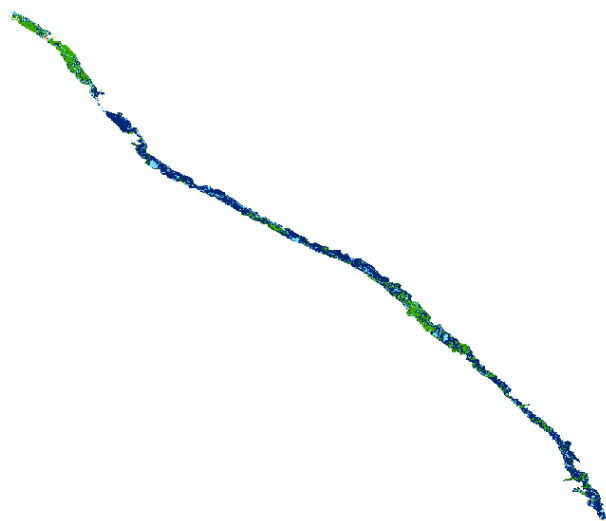

395

396

397

**Table S86.** Confusion Matrix with commission and omission errors from August to mid-September 2007

| Classes        | Water | Marsh | Wet meadow | Woody/Shrub | Marginal total | Comission Error | Total Accuracy | Kappa Index |
|----------------|-------|-------|------------|-------------|----------------|-----------------|----------------|-------------|
| Water          | 84    | 10    | 6          | 0           | 100            | 0.16            | 83.5%          | 0.78        |
| Marsh          | 4     | 83    | 4          | 9           | 100            | 0.17            |                |             |
| Wet meadow     | 1     | 8     | 85         | 6           | 100            | 0.15            |                |             |
| Woody/Shrub    | 0     | 10    | 8          | 82          | 100            | 0.18            |                |             |
| Marginal total | 89    | 111   | 103        | 97          | 400            |                 |                |             |
| Omission Error | 0.06  | 0.25  | 0.17       | 0.15        |                |                 |                |             |

398

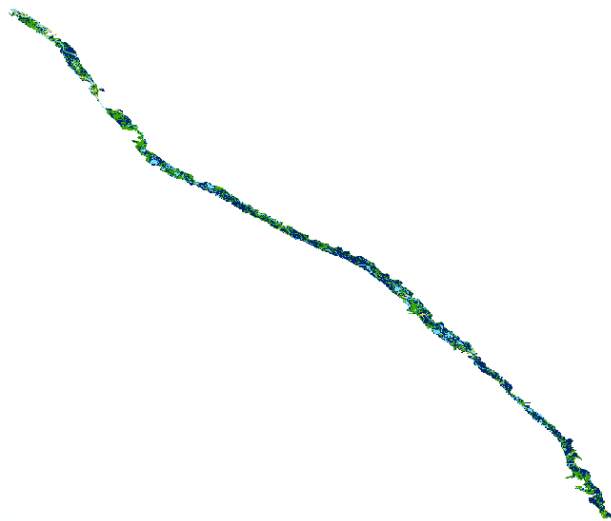

399

400

401 **Table S87.** Confusion Matrix with commission and omission errors from August to mid-September 2008

| Classes        | Water | Marsh | Wet meadow | Woody/Shrub | Marginal total | Comission Error | Total Accuracy | Kappa Index |
|----------------|-------|-------|------------|-------------|----------------|-----------------|----------------|-------------|
| Water          | 53    | 3     | 4          | 0           | 60             | 0.12            | 88.8%          | 0.85        |
| Marsh          | 1     | 54    | 0          | 5           | 60             | 0.10            |                |             |
| Wet meadow     | 0     | 5     | 53         | 2           | 60             | 0.12            |                |             |
| Woody/Shrub    | 0     | 6     | 1          | 53          | 60             | 0.12            |                |             |
| Marginal total | 54    | 68    | 58         | 60          | 240            |                 |                |             |
| Omission Error | 0.02  | 0.21  | 0.09       | 0.12        |                |                 |                |             |

402

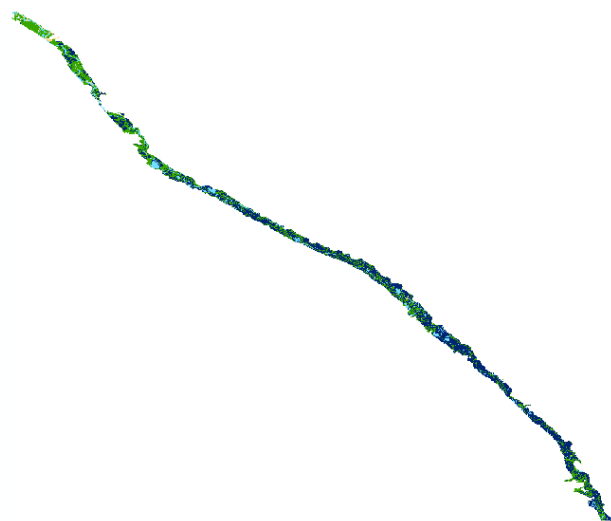

403

404

405

406

**Table S88.** Confusion Matrix with commission and omission errors from August to mid-September 2009

| Classes        | Water | Marsh | Wet meadow | Woody/Shrub | Marginal total | Comission Error | Total Accuracy | Kappa Index |
|----------------|-------|-------|------------|-------------|----------------|-----------------|----------------|-------------|
| Water          | 86    | 5     | 9          | 0           | 100            | 0.14            |                |             |
| Marsh          | 2     | 81    | 11         | 6           | 100            | 0.19            |                |             |
| Wet meadow     | 4     | 6     | 80         | 10          | 100            | 0.20            | 82.8%          | 0.77        |
| Woody/Shrub    | 0     | 4     | 12         | 84          | 100            | 0.16            |                |             |
| Marginal total | 92    | 96    | 112        | 100         | 400            |                 |                |             |
| Omission Error | 0.07  | 0.16  | 0.29       | 0.16        |                |                 |                |             |

407

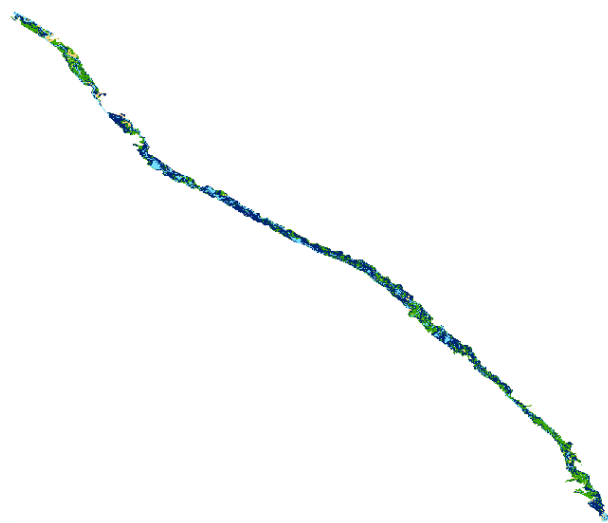

408

409

410

**Table S89.** Confusion Matrix with commission and omission errors from August to mid-September 2010

| Classes        | Water | Marsh | Wet meadow | Woody/Shrub | Marginal total | Comission Error | Total Accuracy | Kappa Index |
|----------------|-------|-------|------------|-------------|----------------|-----------------|----------------|-------------|
| Water          | 56    | 2     | 2          | 0           | 60             | 0.07            |                |             |
| Marsh          | 1     | 55    | 0          | 4           | 60             | 0.08            |                |             |
| Wet meadow     | 0     | 4     | 52         | 4           | 60             | 0.13            | 89.6%          | 0.86        |
| Woody/Shrub    | 0     | 4     | 4          | 52          | 60             | 0.13            |                |             |
| Marginal total | 57    | 65    | 58         | 60          | 240            |                 |                |             |
| Omission Error | 0.02  | 0.15  | 0.10       | 0.13        |                |                 |                |             |

411

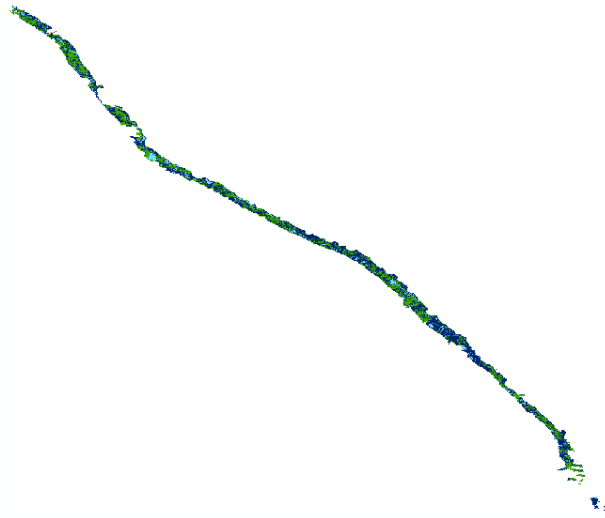

412

413

414

**Table S90.** Confusion Matrix with commission and omission errors from August to mid-September 2011

| Classes        | Water | Marsh | Wet meadow | Woody/Shrub | Marginal total | Comission Error | Total Accuracy | Kappa Index |
|----------------|-------|-------|------------|-------------|----------------|-----------------|----------------|-------------|
| Water          | 53    | 3     | 4          | 0           | 60             | 0.12            | 87.9%          | 0.84        |
| Marsh          | 1     | 53    | 0          | 6           | 60             | 0.12            |                |             |
| Wet meadow     | 0     | 4     | 52         | 4           | 60             | 0.13            |                |             |
| Woody/Shrub    | 0     | 4     | 3          | 53          | 60             | 0.12            |                |             |
| Marginal total | 54    | 64    | 59         | 63          | 240            |                 |                |             |
| Omission Error | 0.02  | 0.17  | 0.12       | 0.16        |                |                 |                |             |

415

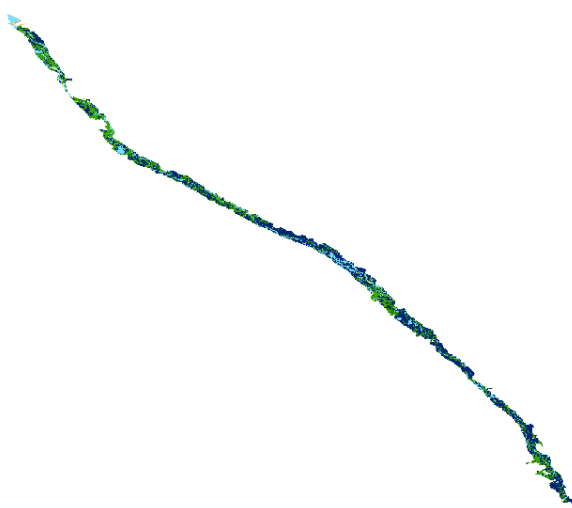

416

417

418

419

**Table S91.** Confusion Matrix with commission and omission errors from August to mid-September 2013

| Classes        | Water | Marsh | Wet meadow | Woody/Shrub | Marginal total | Comission Error | Total Accuracy | Kappa Index |
|----------------|-------|-------|------------|-------------|----------------|-----------------|----------------|-------------|
| Water          | 52    | 5     | 3          | 0           | 60             | 0.13            | 88.8%          | 0.85        |
| Marsh          | 1     | 55    | 1          | 3           | 60             | 0.08            |                |             |
| Wet meadow     | 0     | 4     | 50         | 6           | 60             | 0.17            |                |             |
| Woody/Shrub    | 0     | 3     | 1          | 56          | 60             | 0.07            |                |             |
| Marginal total | 53    | 67    | 55         | 65          | 240            |                 |                |             |
| Omission Error | 0.02  | 0.18  | 0.09       | 0.14        |                |                 |                |             |

420

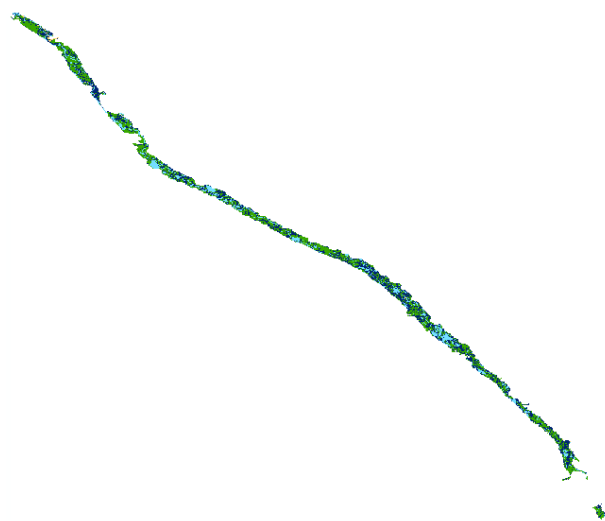

421

422

423

**Table S92.** Confusion Matrix with commission and omission errors from August to mid-September 2014

| Classes        | Water | Marsh | Wet meadow | Woody/Shrub | Marginal total | Comission Error | Total Accuracy | Kappa Index |
|----------------|-------|-------|------------|-------------|----------------|-----------------|----------------|-------------|
| Water          | 54    | 5     | 1          | 0           | 60             | 0.10            | 88.8%          | 0.85        |
| Marsh          | 1     | 54    | 0          | 5           | 60             | 0.10            |                |             |
| Wet meadow     | 0     | 3     | 53         | 4           | 60             | 0.12            |                |             |
| Woody/Shrub    | 0     | 3     | 5          | 52          | 60             | 0.13            |                |             |
| Marginal total | 55    | 65    | 59         | 61          | 240            |                 |                |             |
| Omission Error | 0.02  | 0.17  | 0.10       | 0.15        |                |                 |                |             |

424

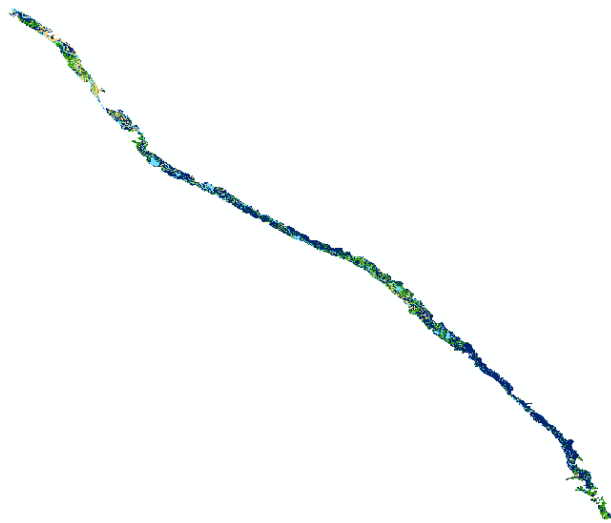

425

426

427

**Table S93.** Confusion Matrix with commission and omission errors from August to mid-September 2015

| Classes        | Water | Marsh | Wet meadow | Woody/Shrub | Marginal total | Comission Error | Total Accuracy | Kappa Index |
|----------------|-------|-------|------------|-------------|----------------|-----------------|----------------|-------------|
| Water          | 52    | 4     | 4          | 0           | 60             | 0.13            | 86.3%          | 0.82        |
| Marsh          | 2     | 53    | 0          | 5           | 60             | 0.12            |                |             |
| Wet meadow     | 0     | 3     | 51         | 6           | 60             | 0.15            |                |             |
| Woody/Shrub    | 0     | 4     | 5          | 51          | 60             | 0.15            |                |             |
| Marginal total | 54    | 64    | 60         | 62          | 240            |                 |                |             |
| Omission Error | 0.04  | 0.17  | 0.15       | 0.18        |                |                 |                |             |

428

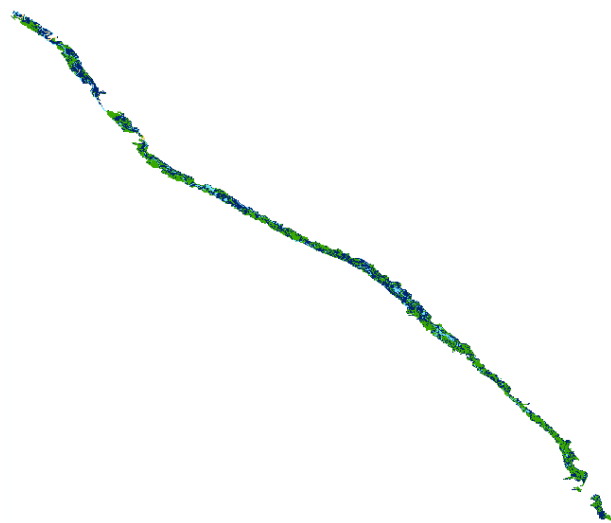

429

430

431



432

**Table S94.** Confusion Matrix with commission and omission errors from August to mid-September 2016

| Classes        | Water | Marsh | Wet meadow | Woody/Shrub | Marginal total | Comission Error | Total Accuracy | Kappa Index |
|----------------|-------|-------|------------|-------------|----------------|-----------------|----------------|-------------|
| Water          | 80    | 9     | 11         | 0           | 100            | 0.20            | 80.5%          | 0.74        |
| Marsh          | 8     | 82    | 10         | 0           | 100            | 0.18            |                |             |
| Wet meadow     | 4     | 8     | 81         | 7           | 100            | 0.19            |                |             |
| Woody/Shrub    | 0     | 9     | 12         | 79          | 100            | 0.21            |                |             |
| Marginal total | 92    | 108   | 114        | 86          | 400            |                 |                |             |
| Omission Error | 0.13  | 0.24  | 0.29       | 0.08        |                |                 |                |             |

433

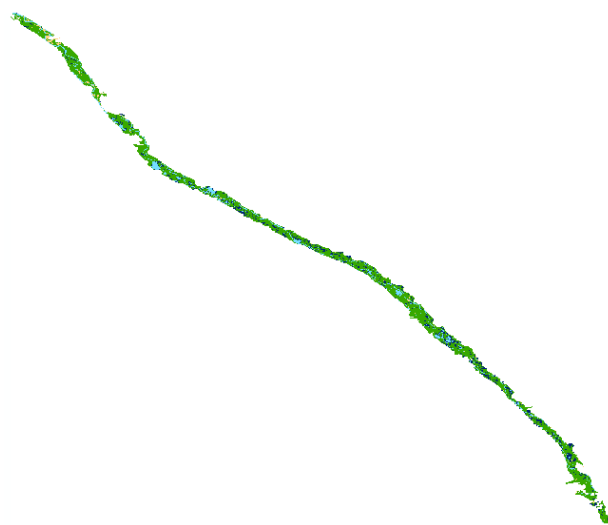

434

435

436

**Table S95.** Confusion Matrix with commission and omission errors from August to mid-September 2017

| Classes        | Water | Marsh | Wet meadow | Woody/Shrub | Marginal total | Comission Error | Total Accuracy | Kappa Index |
|----------------|-------|-------|------------|-------------|----------------|-----------------|----------------|-------------|
| Water          | 83    | 10    | 7          | 0           | 100            | 0.17            | 83.8%          | 0.78        |
| Marsh          | 5     | 81    | 14         | 0           | 100            | 0.19            |                |             |
| Wet meadow     | 5     | 7     | 85         | 3           | 100            | 0.15            |                |             |
| Woody/Shrub    | 0     | 4     | 10         | 86          | 100            | 0.14            |                |             |
| Marginal total | 93    | 102   | 116        | 89          | 400            |                 |                |             |
| Omission Error | 0.11  | 0.21  | 0.27       | 0.03        |                |                 |                |             |

437

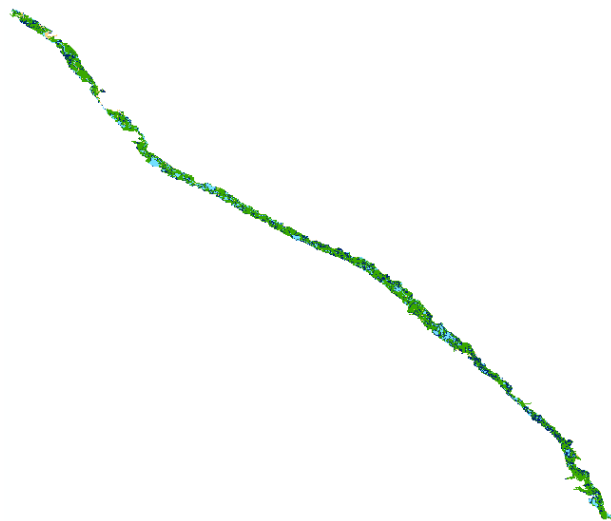

438

439

440 **Table S96.** Confusion Matrix with commission and omission errors from August to mid-September 2018

| Classes        | Water | Marsh | Wet meadow | Woody/Shrub | Marginal total | Comission Error | Total Accuracy | Kappa Index |
|----------------|-------|-------|------------|-------------|----------------|-----------------|----------------|-------------|
| Water          | 81    | 5     | 14         | 0           | 100            | 0.19            |                |             |
| Marsh          | 5     | 83    | 10         | 2           | 100            | 0.17            |                |             |
| Wet meadow     | 5     | 7     | 85         | 3           | 100            | 0.15            | 83.3%          | 0.78        |
| Woody/Shrub    | 0     | 5     | 11         | 84          | 100            | 0.16            |                |             |
| Marginal total | 91    | 100   | 120        | 89          | 400            |                 |                |             |
| Omission Error | 0.11  | 0.17  | 0.29       | 0.06        |                |                 |                |             |

441

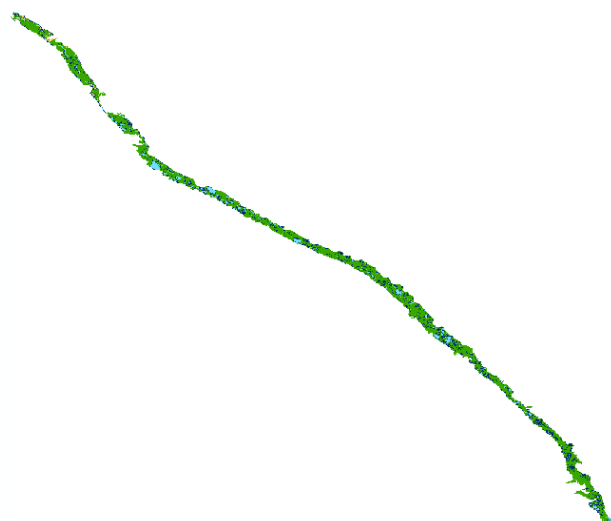

442

443

444

445

**Table S97.** Confusion Matrix with commission and omission errors from August to mid-September 2019

| Classes        | Water | Marsh | Wet meadow | Woody/Shrub | Marginal total | Comission Error | Total Accuracy | Kappa Index |
|----------------|-------|-------|------------|-------------|----------------|-----------------|----------------|-------------|
| Water          | 80    | 9     | 11         | 0           | 100            | 0.20            | 81.5%          | 0.75        |
| Marsh          | 4     | 81    | 10         | 5           | 100            | 0.19            |                |             |
| Wet meadow     | 6     | 7     | 81         | 6           | 100            | 0.19            |                |             |
| Woody/Shrub    | 0     | 8     | 8          | 84          | 100            | 0.16            |                |             |
| Marginal total | 90    | 105   | 110        | 95          | 400            |                 |                |             |
| Omission Error | 0.11  | 0.23  | 0.26       | 0.12        |                |                 |                |             |

446

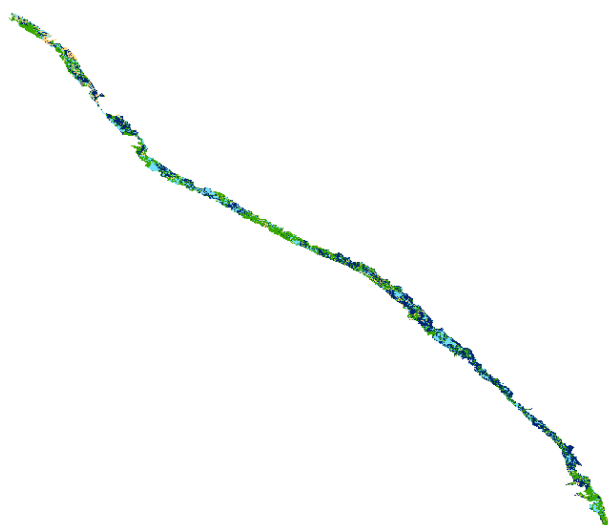

447

448

449

**Table S98.** Confusion Matrix with commission and omission errors from August to mid-September 2020

| Classes        | Water | Marsh | Wet meadow | Woody/Shrub | Marginal total | Comission Error | Total Accuracy | Kappa Index |
|----------------|-------|-------|------------|-------------|----------------|-----------------|----------------|-------------|
| Water          | 84    | 7     | 9          | 0           | 100            | 0.16            | 85.0%          | 0.80        |
| Marsh          | 6     | 85    | 9          | 0           | 100            | 0.15            |                |             |
| Wet meadow     | 5     | 8     | 85         | 2           | 100            | 0.15            |                |             |
| Woody/Shrub    | 0     | 7     | 7          | 86          | 100            | 0.14            |                |             |
| Marginal total | 95    | 107   | 110        | 88          | 400            |                 |                |             |
| Omission Error | 0.12  | 0.21  | 0.23       | 0.02        |                |                 |                |             |

450

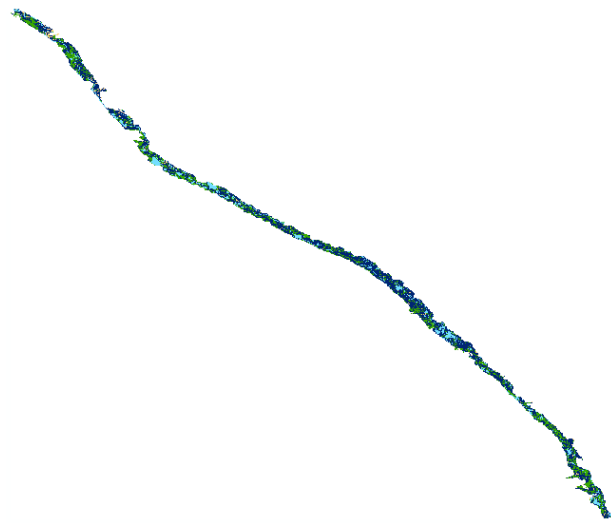

451

452

453 **Table S99.** Confusion Matrix with commission and omission errors from August to mid-September 2021

| Classes        | Water | Marsh | Wet meadow | Woody/Shrub | Marginal total | Comission Error | Total Accuracy | Kappa Index |
|----------------|-------|-------|------------|-------------|----------------|-----------------|----------------|-------------|
| Water          | 81    | 9     | 10         | 0           | 100            | 0.19            |                |             |
| Marsh          | 6     | 82    | 12         | 0           | 100            | 0.18            |                |             |
| Wet meadow     | 3     | 5     | 84         | 8           | 100            | 0.16            | 82.0%          | 0.76        |
| Woody/Shrub    | 0     | 9     | 10         | 81          | 100            | 0.19            |                |             |
| Marginal total | 90    | 105   | 116        | 89          | 400            |                 |                |             |
| Omission Error | 0.10  | 0.22  | 0.28       | 0.09        |                |                 |                |             |

454

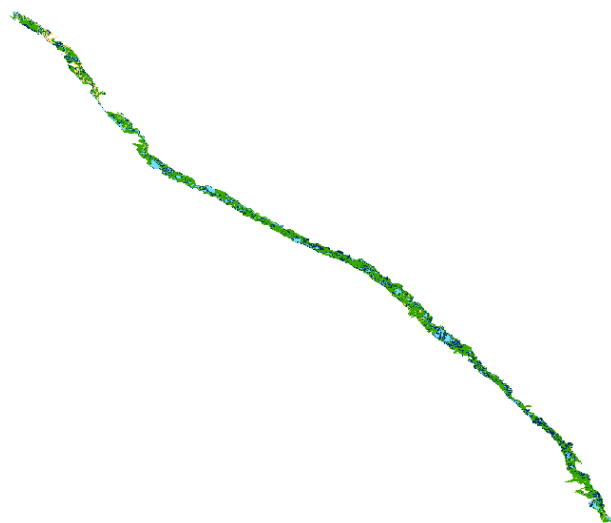

455

456

457

458

**Table S100.** Confusion Matrix with commission and omission errors from August to mid-September 2022

| Classes        | Water | Marsh | Wet meadow | Woody/Shrub | Marginal total | Comission Error | Total Accuracy | Kappa Index |
|----------------|-------|-------|------------|-------------|----------------|-----------------|----------------|-------------|
| Water          | 81    | 9     | 10         | 0           | 100            | 0.19            |                |             |
| Marsh          | 8     | 82    | 10         | 0           | 100            | 0.18            |                |             |
| Wet meadow     | 3     | 5     | 84         | 8           | 100            | 0.16            | 82.0%          | 0.76        |
| Woody/Shrub    | 0     | 3     | 16         | 81          | 100            | 0.19            |                |             |
| Marginal total | 92    | 99    | 120        | 89          | 400            |                 |                |             |
| Omission Error | 0.12  | 0.17  | 0.30       | 0.09        |                |                 |                |             |

459

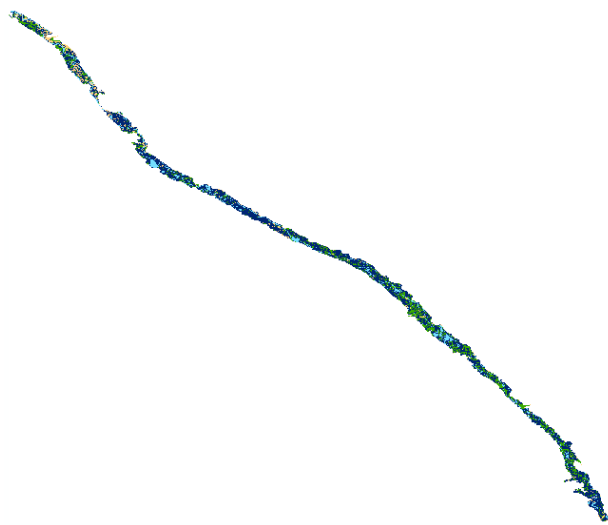

460

461

462

463

464

465

466

467

468

469

470

471 **3. Location and type of change**

472 **Table S101.** Main land use changed locations in 39 years (1984 - 2022) between Invermere and Brisco.

| Variable                | Invermere to Brisco |                     |                          |
|-------------------------|---------------------|---------------------|--------------------------|
|                         | Latitude            | Longitude           | Type of Change           |
| April to mid-May        | -116.070038         | 50.584393           | Marsh -> Woody           |
|                         | -116.095173         | 50.603175           | Increasing Woody         |
|                         | -116.04308          | 50.528733           | Marsh -> Woody           |
|                         | -116.177899         | 50.736033           | Increasing Woody         |
|                         | -116.239655         | 50.78855            | Marsh -> Wet meadow      |
|                         | -116.125143         | 50.670709           | Marsh -> Wet meadow      |
|                         | -116.174606         | 50.713339           | Marsh -> Woody           |
|                         | -116.081219         | 50.574385           | Increasing Woody         |
|                         | -116.277338         | 50.811556           | Marsh -> Wet meadow      |
|                         | -116.162224         | 50.703786           | Marsh -> Wet meadow      |
| Peak flow               | -116.038112         | 50.526231           | Marsh -> Woody           |
|                         | -116.093436         | 50.606662           | Marsh -> Woody           |
|                         | -116.090273         | 50.63334            | Marsh -> Woody           |
|                         | -116.11979          | 50.670035           | Marsh -> Open Water      |
|                         | -116.14746          | 50.698404           | Open Water -> Marsh      |
|                         | -116.198786         | 50.738707           | Marsh -> Woody           |
|                         | -116.19326          | 50.738995           | Marsh -> Wet meadow      |
|                         | -116.221557         | 50.765768           | Open Water -> Wet meadow |
|                         | -116.24932          | 50.788413           | Open Water -> Wet meadow |
|                         | -116.27364          | 50.812031           | Marsh -> Wet meadow      |
| August to mid-September | -116.038535         | 50.521344           | Open Water -> Wet meadow |
|                         | -116.064085         | 50.550234           | Increasing Woody         |
|                         | -116.092762         | 50.60131            | Increasing Woody         |
|                         | -116.104538         | 50.633638           | Increasing Woody         |
|                         | -116.130242         | 50.67333            | Marsh -> Woody           |
|                         | -116.171825         | 50.710084           | Marsh -> Woody           |
|                         | -116.217978         | 50.759342           | Open Water -> Marsh      |
|                         | -116.237113         | 50.781734           | Marsh -> Woody           |
|                         | -116.25554          | 50.794001           | Marsh -> Woody           |
| -116.290514             | 50.822827           | Open Water -> Marsh |                          |

473  
474  
475  
476

477 **Table S102.** Main land use changed locations in 39 years (1984 - 2022) between Brisco and Spillimacheen.

| Variable                | Brisco - Spillimacheen |           |                          |
|-------------------------|------------------------|-----------|--------------------------|
|                         | Latitude               | Longitude | Type of Change           |
| April to mid-May        | -116.296517            | 50.840185 | Marsh -> Wet meadow      |
|                         | -116.359798            | 50.877271 | Marsh -> Woody           |
|                         | -116.322492            | 50.848615 | Open Water -> Wet meadow |
|                         | -116.334955            | 50.860212 | Open Water -> Marsh      |
|                         | -116.319927            | 50.837705 | Marsh -> Woody           |
|                         | -116.350209            | 50.874409 | Marsh -> Open Water      |
|                         | -116.344624            | 50.885097 | Marsh -> Open Water      |
|                         | -116.371156            | 50.882477 | Marsh -> Wet meadow      |
|                         | -116.296917            | 50.846019 | Marsh -> Wet meadow      |
|                         | -116.319993            | 50.860906 | Open Water -> Wet meadow |
| Peak flow               | -116.289817            | 50.830419 | Marsh -> Wet meadow      |
|                         | -116.297046            | 50.830983 | Marsh -> Woody           |
|                         | -116.294508            | 50.838653 | Marsh -> Wet meadow      |
|                         | -116.320395            | 50.83832  | Increasing Woody         |
|                         | -116.313122            | 50.847201 | Increase Open Water      |
|                         | -116.324668            | 50.86354  | Increasing Woody         |
|                         | -116.327038            | 50.855792 | Increasing Open Water    |
|                         | -116.355121            | 50.877561 | Open Water -> Marsh      |
|                         | -116.368778            | 50.886045 | Open Water -> Marsh      |
|                         | -116.370496            | 50.881495 | Increasing of Woody      |
| August to mid-September | -116.29541             | 50.834518 | Increase of Woody        |
|                         | -116.293753            | 50.837741 | Marsh -> Wet meadow      |
|                         | -116.293775            | 50.842699 | Marsh -> Wet meadow      |
|                         | -116.31053             | 50.846637 | Open water -> Wet meadow |
|                         | -116.305856            | 50.840886 | Open water -> Wet meadow |
|                         | -116.333778            | 50.860109 | Marsh -> Open water      |
|                         | -116.32318             | 50.853831 | Marsh -> Woody           |
|                         | -116.35226             | 50.86656  | Open Water -> Marsh      |
|                         | -116.325442            | 50.864001 | Increasing Woody         |
|                         | -116.376093            | 50.886876 | Reduction Open Water     |

478  
 479  
 480  
 481  
 482  
 483  
 484  
 485

**Table S103.** Main land use changed locations in 39 years (1984 - 2022) between Spillimacheen and Golden

| Variable                | Spillimacheen - Golden |                     |                          |
|-------------------------|------------------------|---------------------|--------------------------|
|                         | Latitude               | Longitude           | Type of Change           |
| April to mid-May        | -116.381517            | 50.904509           | Open Water -> Wet meadow |
|                         | -116.426604            | 50.947291           | Open Water -> Wet meadow |
|                         | -116.507493            | 51.003967           | Marsh -> Woody           |
|                         | -116.607194            | 51.047293           | Reduction Open Water     |
|                         | -116.680141            | 51.080912           | Open Water -> Wet meadow |
|                         | -116.729989            | 51.113138           | Reduction Open Water     |
|                         | -116.753706            | 51.123268           | Marsh -> Woody           |
|                         | -116.786234            | 51.140634           | Open Water -> Wet meadow |
|                         | -116.839237            | 51.158389           | Marsh -> Wet meadow      |
|                         | -116.962987            | 51.275513           | Reduction Open Water     |
| Peak flow               | -116.381174            | 50.904655           | Reduction Open Water     |
|                         | -116.382784            | 50.921354           | Open Water -> Marsh      |
|                         | -116.432436            | 50.942758           | Marsh -> Open Water      |
|                         | -116.5587              | 51.030912           | Marsh -> Woody           |
|                         | -116.631734            | 51.055287           | Marsh -> Woody           |
|                         | -116.704028            | 51.091648           | Open Water -> Wet meadow |
|                         | -116.807933            | 51.150807           | Increasing of Woody      |
|                         | -116.832644            | 51.157964           | Marsh -> Wet meadow      |
|                         | -116.903095            | 51.223405           | Increasing Woody         |
| -116.931728             | 51.264756              | Open Water -> Marsh |                          |
| August to mid-September | -116.368994            | 50.900224           | Marsh -> Woody           |
|                         | -116.400081            | 50.915843           | Increasing Woody         |
|                         | -116.437284            | 50.958089           | Increasing Woody         |
|                         | -116.474132            | 50.989651           | Open Water -> Wet meadow |
|                         | -116.560292            | 51.029483           | Increasing Woody         |
|                         | -116.613644            | 51.054003           | Marsh -> Woody           |
|                         | -116.676204            | 51.080471           | Open Water -> Wet meadow |
|                         | -116.821183            | 51.152432           | Marsh -> Woody           |
|                         | -116.865949            | 51.184354           | Increasing Woody         |
| -116.933324             | 51.263125              | Open Water -> Marsh |                          |

487

488

489

490

491

492

493

494



**Table S104.** Main land use changed locations in 39 years (1984 - 2022) between Golden and Donald

| Variable                | Golden - Donald |                  |                          |
|-------------------------|-----------------|------------------|--------------------------|
|                         | Latitude        | Longitude        | Type of Change           |
| April to mid-May        | -116.992146     | 51.320568        | Increasing Woody         |
|                         | -117.01136      | 51.345238        | Open Water -> Wet meadow |
|                         | -117.014935     | 51.360769        | Increasing Woody         |
|                         | -117.055091     | 51.402087        | Marsh -> Woody           |
|                         | -117.040339     | 51.397867        | Open Water -> Marsh      |
|                         | -117.073468     | 51.424158        | Increasing Woody         |
|                         | -117.083538     | 51.435288        | Open Water -> Wet meadow |
|                         | -117.10259      | 51.450278        | Open Water -> Wet meadow |
|                         | -117.113668     | 51.456344        | Open Water -> Wet meadow |
|                         | -117.125409     | 51.448876        | Open Water -> Wet meadow |
| Peak flow               | -116.981377     | 51.32178         | Marsh -> Wet meadow      |
|                         | -116.995945     | 51.326782        | Marsh -> Open Water      |
|                         | -117.006986     | 51.348752        | Increasing Woody         |
|                         | -117.015061     | 51.348185        | Marsh -> Woody           |
|                         | -117.016769     | 51.361068        | Open Water -> Marsh      |
|                         | -117.047576     | 51.387613        | Open Water -> Marsh      |
|                         | -117.084054     | 51.429086        | Increasing Woody         |
|                         | -117.102849     | 51.436973        | Open Water -> Wet meadow |
|                         | -117.088435     | 51.436425        | Open Water -> Wet meadow |
|                         | -117.117431     | 51.448929        | Increasing Woody         |
| August to mid-September | -116.992433     | 51.321521        | Increasing Woody         |
|                         | -117.000772     | 51.338861        | Open Water -> Wet meadow |
|                         | -117.040707     | 51.397238        | Marsh -> Wet meadow      |
|                         | -117.067665     | 51.415269        | Open Water -> Marsh      |
|                         | -117.090323     | 51.43747         | Open Water -> Wet meadow |
|                         | -117.112821     | 51.455289        | Open Water -> Wet meadow |
|                         | -117.146128     | 51.46369         | Increasing Woody         |
|                         | -117.12988      | 51.455909        | Increasing Woody         |
|                         | -117.093061     | 51.441884        | Increasing Woody         |
| -117.087133             | 51.426688       | Increasing Woody |                          |
